# Supplementary material for: Genetic Associations with Gestational Length and Spontaneous Preterm Birth
Source: PubMed Central journal article supplement (PMC5561422; doi:10.1056/nejmoa1612665), 2017-09-06
Supplement: NEJMoa1612665-Muglia-Supplement.pdf [file NEJMoa1612665-Muglia-Supplement.pdf]

# Contents

|                                                                                                                                                  |           |
|--------------------------------------------------------------------------------------------------------------------------------------------------|-----------|
| <b>Supplementary Text .....</b>                                                                                                                  | <b>3</b>  |
| <i>Overview of study design</i> .....                                                                                                            | 3         |
| <i>Discovery methods</i> .....                                                                                                                   | 3         |
| <i>Replication methods</i> .....                                                                                                                 | 5         |
| <i>Functional annotation of SNPs at significant loci</i> .....                                                                                   | 7         |
| <i>Other statistical and bioinformatic analyses</i> .....                                                                                        | 8         |
| <i>Functional analyses of the WNT4 locus</i> .....                                                                                               | 10        |
| <b>Supplementary Figures.....</b>                                                                                                                | <b>13</b> |
| Figure S1. Histogram of self-reported gestational age in the 23andMe data set .....                                                              | 13        |
| Figure S2. Distribution of gestational length in the three Nordic data sets (Top:FIN; Middle:MoBa; Bottom: DNBC).....                            | 14        |
| Figure S3. QQ plot of GWA results (discovery phase).....                                                                                         | 15        |
| Figure S4. Correlation between effect sizes estimated from mothers and infants (replication phase) .....                                         | 16        |
| Figure S5. Regional plots of genomic loci associated with gestational age .....                                                                  | 17        |
| Figure S6. Regional plots of genomic loci associated with preterm birth .....                                                                    | 24        |
| Figure S7. Variance explained in the replication studies using associated SNPs.....                                                              | 29        |
| Figure S8. Manhattan plot of gene-wise association <i>P</i> values.....                                                                          | 30        |
| Figure S9. Gene set enrichment analysis showing enrichment of association signals in genes implicated in pregnancy related biological terms..... | 31        |
| <b>Supplementary Tables .....</b>                                                                                                                | <b>32</b> |
| Table S1. Study datasets .....                                                                                                                   | 32        |
| Table S2. Phenotype data of discovery samples (23andMe).....                                                                                     | 33        |
| Table S3. Influences of co-variates in discovery samples .....                                                                                   | 34        |
| Table S4. Influence of covariates on gestational age (replication studies).....                                                                  | 35        |
| Table S5. Suggestive GWA regions (discovery phase) .....                                                                                         | 36        |
| Table S6. Association results obtained from “spontaneous only” and the full discovery data set. ...                                              | 37        |
| Table S7. Discovery and replication of GWA loci associated with gestational age .....                                                            | 38        |
| Table S8. Discovery and replication of GWA loci associated with preterm birth .....                                                              | 40        |
| Table S9. Associations with known GWA SNPs.....                                                                                                  | 41        |

|                                                                                                                                         |           |
|-----------------------------------------------------------------------------------------------------------------------------------------|-----------|
| Table S10. eQTLs in GWA loci associated with gestational length .....                                                                   | 42        |
| Table S11. eQTLs in GWA loci associated with preterm birth .....                                                                        | 44        |
| Table S12. Replication of GWA loci associated with gestational age using infant samples .....                                           | 45        |
| Table S13. Replication of GWA loci associated with preterm birth using infant samples.....                                              | 47        |
| Table S14. Comparison of effect sizes estimated from mothers and infants.....                                                           | 48        |
| Table S15. Joint maternal and fetal genetic association analysis in mother/infant pairs .....                                           | 49        |
| Table S16. Conditional association tests of replicated loci.....                                                                        | 50        |
| Table S17. Variance explained by all common SNPs (MAF > 0.01) estimated using GCTA .....                                                | 51        |
| Table S18. Variance explained in the replication studies using GWA SNPs identified from discovery data set (23andMe).....               | 52        |
| Table S19. Difference in gestational length between individuals with high (top quartile) and low (bottom quartile) genetic scores ..... | 53        |
| <b>Supplementary References .....</b>                                                                                                   | <b>54</b> |

## Supplementary Text

### *Overview of study design*

We performed a two-stage genomewide association study to discover and replicate associations of genetic loci with gestational age as a continuous trait and preterm birth as a dichotomous trait. In the discovery stage, we performed genomewide association analysis in more than 40 thousands unrelated European women identified among 23andMe's research participants. In the replication stage, the most significant findings from the discovery stage were tested in 8,643 mothers from three independent birth studies from Nordic countries (Finland, Denmark, and Norway).

### *Discovery methods*

**Participants in the 23andMe data set** were customers of 23andMe who consented to participate in research and answered survey questions online. Women of European ancestry who reported live singleton birth with gestational length information (in weeks) were included in the analysis. Women who reported a medical indication for their delivery were excluded from the study as we sought mechanisms for spontaneous birth; those who did not specify a choice of spontaneous or medically indicated delivery on the survey were retained to optimize sample size. Preterm birth status was assigned to individuals based on dichotomization of their self-reported gestational age (preterm term < 37 weeks; normal term  $\geq$  37 weeks). The under-representation of women reporting 39 weeks of gestation reflects the survey structure. Women were first asked whether their delivery was "more than a week before my due date", "within a week of my due date", or "more than a week after my due date". Women who answered "within a week of my due date" were assigned a gestational age of 40 weeks. Women who answered other than "within a week of my due date" were asked a follow-up question to determine weeks of gestation (Fig. S1).

**DNA extraction and genotyping** were performed on saliva samples by National Genetics Institute (NGI), a CLIA licensed clinical laboratory and a subsidiary of Laboratory Corporation of America. Samples were genotyped on one of four genotyping platforms. The V1 and V2 platforms were variants of the Illumina HumanHap550+ BeadChip, including approximately 25,000 custom SNPs selected by 23andMe, with a total of approximately 560,000 SNPs. The V3 platform was based on the Illumina OmniExpress+ BeadChip, with custom content to improve the overlap with the V2 array, with a total of approximately 950,000 SNPs. The V4

platform is a fully custom array, including a lower redundancy subset of V2 and V3 SNPs with additional coverage of lower-frequency coding variation, and about 570,000 SNPs. Samples were required to have a call rate of 98.5% or higher to be included in the study.

**To minimize the effects of population stratification**, our analyses were restricted to women who have >97% European ancestry, as determined through an analysis of local ancestry.<sup>1</sup> The reference population data is derived from public datasets (the Human Genome Diversity Project, HapMap, and 1000 Genomes), as well as 23andMe participants who reported having four grandparents from the same country. A maximal set of unrelated individuals was chosen for each analysis using a segmental identity-by-descent (IBD) estimation algorithm.<sup>2</sup> Individuals were defined as related if they shared more than 700 cM IBD, including regions where the two individuals share either one or both genomic segments identical-by-descent.

**Participant genotype data were imputed** against the September 2013 release of 1000 Genomes Phase1 reference haplotypes. The 23andMe participants were phased using an internally developed phasing tool, Finch, which implements the Beagle haplotype graph-based phasing algorithm,<sup>3</sup> modified to separate the haplotype graph construction and phasing steps.

In preparation for imputation, SNPs deviated from Hardy-Weinberg equilibrium ( $P < 1 \times 10^{-20}$ ), with low call rate (< 95%), or with large allele frequency discrepancies compared to European 1000 Genomes reference data were excluded. Frequency discrepancies were identified by computing a 2x2 table of allele counts for European 1000 Genomes samples and 2000 randomly sampled 23andMe participants with European ancestry, and identifying SNPs with a chi squared test ( $P < 1 \times 10^{-15}$ ). We imputed phased haplotypes against all-ethnicity 1000 Genomes haplotypes (excluding monomorphic and singleton sites) using Minimac2,<sup>4</sup> using 5 rounds and 200 states for parameter estimation.

**Single-marker tests for genetic association** with gestational age and preterm birth were performed by linear regression and logistic regression, respectively, using imputed allelic dosage data assuming additive allelic effects. Maternal age and the top five principal components to account for residual population structure were included as covariates. The association test  $P$  values were computed using a likelihood ratio test.

We clustered SNPs into association regions (or loci) based on their  $P$  values and physical proximity. Specifically, we defined association regions by firstly identifying SNPs with association  $P < 1 \times 10^{-4}$ , then grouping these into a region if they were adjacent to each other (<250kb). The SNP with smallest  $P$  value (leading SNP) within each region was chosen as the

index SNP. Regions that achieved genomewide suggestive significance ( $P < 1 \times 10^{-6}$ ) were tested for replication in the replication stage. The significant SNPs ( $P < 1 \times 10^{-6}$ ) and their close proxies ( $r^2 > 0.8$ ) within each putative region were examined in the replication stage.

To confirm the robustness of the association signals, we conducted association tests in a subset of discovery samples who explicitly checked “spontaneous delivery” in the questionnaire (excluding those who did not specify a choice of spontaneous or medically indicated delivery) and compared the results with those obtained from the full discovery data set (Table S6).

### *Replication methods*

We used phenotype and genomewide SNP data of 8,643 mothers from birth studies collected from three Nordic countries to replicate the discovery stage findings (Table S1).

**The Finnish dataset (FIN)** was collected for a genetic study of preterm birth.<sup>5</sup> Briefly, whole blood samples were collected from more than 800 mother/child pairs from the Helsinki (southern Finland) University Hospitals between 2004 and 2014. All of these studied samples are of Finnish descent. Crown-rump length at the first ultrasound screening between 10+ and 13 weeks was used to determine the gestational age. The study was approved by the Ethics Committee of Oulu University Hospital and that of Helsinki University Central Hospital. Written informed consent was given by all participants.

**The Mother Child dataset of Norway (MoBa)** is a nationwide Norwegian pregnancy study administered by the Norwegian Institute of Public Health. The study includes more than 114,000 children, 95,000 mothers and 75,000 fathers recruited from 1999 through 2008.<sup>6</sup> Gestational age was estimated by ultrasound at gestational weeks 17–19. In the few cases without ultrasound dating, gestational age was estimated using the date of the last menstrual period. For the current study, we used the mother-child pairs that were selected from Version 4 of the MoBa dataset, which included a total of 71,669 pregnancies.<sup>7</sup> Singleton live-born spontaneous pregnancies with mothers in the age group 20–34 years were selected. Pregnancies involving pre-existing medical conditions, pregnancies with complications as well as pregnancies conceived by in vitro fertilization, were excluded from the study. Random sampling was done from two gestational age ranges 154–258 days (cases) and 273–286 days (controls). In total, blood samples from 3,121 mothers and children were genotyped.<sup>7</sup> 1,834 mothers and 1,143 infants that passed QC were included in the analysis. All parents gave informed, written consent. The study was approved by The Regional Committee for Medical Research Ethics in South-Eastern, Norway.

**The Danish National Birth Cohort (DNBC)** followed over 100,000 pregnancies between 1996 and 2003 with extensive epidemiologic data on health outcomes in both mother and child.<sup>8</sup> The current study used genotype data generated in two genomewide association studies. One was a study of preterm delivery<sup>9</sup> and the second was a study of obesity,<sup>10,11</sup> totally including 5,921 mothers and 2,130 infants after QC. Gestational age in this dataset was determined by a consensus algorithm combining all available information from multiple sources: self-reported date of last menstrual period, self-reported delivery date, and gestational age at birth registered in the Medical Birth Register and the National Patient Register. The study protocol was approved by the Danish Scientific Ethical Committee and the Danish Data Protection Agency.

**All the preterm births** included in the Nordic studies were spontaneous. Obstetrical induction of labor, placental abnormalities, preeclampsia, congenital malformations and multiple births were excluded. Pregnancies involving pre-existing medical conditions known to be associated with preterm birth, pregnancies with complications were also excluded. In the MoBa dataset only pregnancies with mothers in the age group of 20-34 years were selected.

**Genotyping was conducted** on DNA extracted from blood using the various SNP arrays previously presented.<sup>12</sup> Specifically, for the FIN dataset, genotyping was conducted using Affymetrix 6.0 (Affymetrix, California, United States) and various other Illumina arrays (Illumina, California, United States). For the Affymetrix SNP Array 6.0, genotype calls were determined using the CRLMM algorithm<sup>13,14</sup> among chips that passed the vendor-suggested QC (Contrast QC > 0.4). For the Illumina chips, the genotype calling was conducted using Illumina's genotyping module v1.94 in the GenomeStudio v2011.1. The samples from the MoBa dataset were genotyped using the Illumina Human660W-Quadv1\_A bead chip (Illumina Inc.) and the genotype calls were determined using CRLMM algorithm. The DNBC samples were genotyped using Human660W-Quad (preterm birth study) and Human610-Quad (obesity study) Bead Arrays from Illumina. Genotype calls were determined using GenomeStudio software (Illumina).

**Similar quality control (QC)** procedures were used across the three Nordic studies. Briefly, individuals with incorrect sex assignment, excessive heterozygosity or low call rate (<98%) were excluded from further analysis. Incorrect mother-child relationships and cryptic relatedness were detected by identity-by-descent (IBD) sharing estimated from genomewide SNPs. Non-European samples were identified and excluded using principal components analysis (PCA) anchored with 1000 Genomes reference samples. At marker level, SNPs with low call rate (<98%), low minor allele frequency (<0.03) or significant deviation from Hardy-Weinberg Equilibrium ( $P < 1 \times 10^{-4}$ ) were excluded.

**We conducted genome-wide imputation.** A standard two-step imputation procedure was followed: the genotype data of the mother and infants was first pre-phased together using Shapeit2 software<sup>15</sup> and then the estimated haplotypes were used to impute untyped SNPs using the reference haplotypes extracted from the Phase I 1000 Genomes Project<sup>16</sup> by either Minimac2<sup>4</sup> (FIN and MoBa) or Impute2<sup>17</sup> (DNBC).

**Single-marker genetic association tests** were conducted in individual replication studies separately, using regression methods and imputation dosage data similar to the discovery stage. In the replication stage, infant gender was included as covariate. Genotypic association tests (d.f. = 2) were also performed to examine possible dominance effect. The test results (inflation adjusted estimates of effect sizes and *P*-values) from the three Nordic studies were combined by fixed effect meta-analysis using the inverse-variance method. In addition, we performed the same association tests in infant samples to distinguish the maternal or fetal origin of the observed significant associations.

**The replication-stage results** were generated using meta-analysis in the three Nordic studies. All discovery-stage SNPs with  $P < 1 \times 10^{-6}$  together with their LD-proxies ( $r^2 > 0.8$ ) were examined in the replication stage. We estimated the effective number of independent SNPs tested in each discovery region<sup>18</sup> using the program simpleM<sup>19</sup> that adjusts for high inter-marker LD. The marker-wise significance thresholds for replication were determined using Bonferroni adjustment: dividing the desired family-wise error rate (0.05) by the effective number of independent SNPs in a discovery region and the total number of discovery regions. Replication-stage *P* values passing this threshold and having the same direction of effect as in discovery stage were regarded as evidence of successful replication. Variants were considered genome-wide significant if they were significantly replicated and had a combined discovery and replication *P* value less than  $5 \times 10^{-8}$ .

### *Functional annotation of SNPs at significant loci*

**We did functional annotation of SNPs** at loci with genome-wide suggestive significance (discovery  $P < 1 \times 10^{-6}$ ). Within each of those putative regions, we first identified genic SNPs that might have functional consequences (i.e. nonsense, missense and splicing SNPs) by searching dbSNP (build 149) and then examined whether these “functional” SNPs are in close LD with the any of the SNPs showing significant association with gestational length or preterm birth with discovery  $P < 1 \times 10^{-6}$ . We also checked whether the SNPs associated with gestational length or

preterm birth overlap or are in close LD with previously reported genomewide association SNPs in GWAS catalog<sup>20</sup> (r2017-01-09).

**We used the Genotype-Tissue Expression (GTEx)<sup>21</sup> database to examine the potential downstream regulatory effects of the SNPs associated with gestational length or preterm birth. The significant SNPs (discovery  $P < 1 \times 10^{-6}$ ) and their close proxies ( $r^2 > 0.8$ ) within each putative region were searched against the GTEx dataset for their potential regulatory effect on gene expression level in different tissues.**

### *Other statistical and bioinformatic analyses*

**To examine if there are multiple independent variants influencing the trait at a locus**, we performed an approximate conditional and joint multiple-SNP (COJO) analysis<sup>22</sup> using the summary statistics of the discovery stage. This method takes linkage disequilibrium (LD) between SNPs into account and adopts a stepwise selection procedure to select SNPs on the basis of conditional  $P$  values<sup>23</sup> and estimate the joint effects of all selected SNPs<sup>22</sup>. The genotype data of the 1000 Genome European samples were used to estimate the LD between SNPs. This analysis revealed a number of loci with  $P < 1 \times 10^{-4}$  at a secondary SNP after conditioning on the index SNP (Table S16, Figure S5 and S6). At the *EBF1* locus the secondary signals were significant even at a Bonferroni-corrected significance threshold of  $P < 2.26 \times 10^{-5}$ , based upon genome coverage of 0.22% (6.6 Mb) by the tested loci. It should be noted that this analysis is exploratory and the existence of secondary association signal needs to be confirmed in large samples with regional genotype data obtained directly by sequencing.

**In the replication dataset, we estimated the fraction of phenotype variance explained by SNPs.** We first estimated the fractions of phenotype variance in gestational age and preterm birth explained by all SNPs with  $MAF > 0.01$  in individual replication studies using GCTA<sup>24</sup> and then combined the results across the three replication using the inverse-variance method. The results (Table S17) indicated that, in our replication data sets, the estimated variance explained by all common SNPs ( $MAF > 0.01$ ) in mothers were ~16% and ~21% for gestational length and preterm birth (liability scale), respectively.

We also examined the percentage of variance explained by the genomewide association SNPs identified from the discovery stage. At different significance levels ( $\alpha = 1 \times 10^{-6} - 5 \times 10^{-5}$ ), sets of index SNPs of the putative associated loci were selected to construct the weighted genetic score. The variance explained in the replication samples was then calculated based on a linear regression model using the constructed genetic score as predictor and the covariates



(maternal age and infant gender) adjusted phenotype (gestational age or preterm birth status) as outcome. We found that, in our replication samples, the genetic score that was constructed based on a dozen to one hundred leading SNPs selected at different significance thresholds explained  $\leq 1\%$  of the observed variance in gestational length (Table S18 and Figure S7). The difference in gestational length was approximately 5 days (95% CI: 3.2, 7.0) between the top and bottom genetic quartile based on the genetic score constructed using the 12 index SNPs with discovery  $P$ -value  $< 1 \times 10^{-6}$  (Table S19).

**We also performed gene-centric association and gene-set enrichment analyses** using MAGMA.<sup>25</sup> First, we used PubMed abstract database to create 28 sets of genes related to various keywords: terms related to pregnancy (e.g. *myometrium*, *preterm*) and control terms (e.g. *liver*, *sleep*). For each keyword, all PubMed abstracts containing that keyword and the words “gene”, “genes”, “genome”, “genomic”, “genetic”, “GWAS” were retrieved. Abstracts mentioning certain pregnancy-complicating diseases (e.g. *diabetes*, *hypertension*) were excluded, as well as abstracts mentioning other animal species, as pregnancy mechanisms are likely to differ in humans. Remaining abstracts were scanned for any HGNC gene names, excluding symbols that match certain common abbreviations (e.g. *DNA*, *PCR*). All gene names detected this way comprise the gene-set for that particular keyword.

MAGMA<sup>25</sup> was then used to summarize SNP-level  $P$  values into gene- and gene-set-level  $P$  values. Gene-level  $P$  values represent the mean association strength of all SNPs located within a particular gene or 50 kb distance from it (see “mean” combination method in MAGMA documentation). Gene-set-level  $P$  values are obtained by comparing the  $P$  values of genes that belong to a particular gene-set vs.  $P$  values of all other genes, while taking into account gene size and density (see “competitive” gene-set analysis in MAGMA documentation). Since the gene-sets constructed here reflect current knowledge of the genetic factors concerning each keyword, we expect obstetrics-related gene-sets to show significant  $P$  values if the genomewide association study indeed worked. Similarly, the control keywords are expected to generate non-significant  $P$  values.

The gene-centric association using MAGMA<sup>25</sup> showed (Figure S8) a similar pattern with the marker-wise analysis (Figure 1) but with the most significant gene-wise  $P$ -value observed at the *EEFSEC* gene. Gene-set enrichment analysis demonstrated that the association signals were highly enriched in genes that have been implicated in pregnancy-related biological concepts such as “preterm,” “endometrium,” “parturition,” and “uterus” (Figure S9).

## *Functional analyses of the WNT4 locus*

**We conducted functional analysis of the *WNT4* locus**, given its plausible functional relevance in pregnancy. First we examined the expression level of *WNT4* in human endometrial stromal cells, before and after decidualization using mRNA-seq technology. Two primary human endometrial stromal fibroblast (ESF) lines (HsESC\_217S and HsESC\_218S) were obtained from the Hugh Taylor/Clare Flannery labs in the Department of Obstetrics, Gynecology, and Reproductive Sciences at Yale University. HsESC\_217S and HsESC\_218S were derived from two separate patients each undergoing a polypectomy surgical procedure on days 3 and 9 of the menstrual cycle, respectively. The cells were grown in DMEM supplemented with 10% charcoal-stripped fetal bovine serum (Gemini), 0.1% ITS (Corning), and 1% antibiotic/antimycotic (ABAM; GIBCO). To induce decidualization, the cells were treated with 0.5mM 8-Br-cAMP (Sigma) and 0.5mM of the progesterone analog, medroxy-progesterone acetate (MPA), for 48 hours in DMEM supplemented with 2% fetal bovine serum (gemini). Cells were examined for markers of ESF cells and markers of normal decidualization.

Total RNA was extracted using the RNeasy Mini kit (Qiagen) followed by on-column DNase I treatment. Total RNA quality was assayed with the Bioanalyzer 2100 (Agilent). RIN values for all samples were above 9.5. RNA samples were then sequenced using the Illumina HiSeq2500. A minimum of 36 million paired end reads were obtained for each sample. Reads were aligned to the human (GRCh37.69) cDNA builds at Ensembl with TopHat2. Reads mapping to each gene feature were counted with HTSeq, and the counts were normalized as transcripts per million (TPM).<sup>26</sup> Three independent samples of each of the primary cell cultures were taken and the expression values used here are the averages for every gene of the three transcriptomes.

**We predicted specific transcription factors whose binding might be altered** by gestational length-associated variants that localize in the *WNT4* locus using the CisBP web server<sup>27</sup> and confirmed the presence of H3K4me3 marks overlapping rs3820282 in a telomerase immortalized endometrial stromal cell line (ATCC CRL-4003) using ChIP-seq<sup>28</sup> technology. Specifically, ChIP-seq was performed using anti-H3K4me3 (Invitrogen, 49-1005) antibody following a previously described protocol.<sup>29</sup> Library preparation and high-throughput sequencing were carried out on the Illumina Genome Analyzer II platform by following the protocol suggested by Illumina for sequencing chromosomal DNA. Two replicates were sequenced at 1x75 bp by the Yale Center for Genome Analysis. Sequence reads were aligned to the human reference genome (hg19) using the ultra-fast short DNA sequence aligner Bowtie2.<sup>30,31</sup> The sequencing depth was 32 million reads per replicate for all input and ChIP samples from

decidualized ESF and 52 million reads per replicate for all input and ChIP samples from ESF. The average alignment rate was 75% for samples from decidualized ESF and 85% for samples from ESF. Only uniquely aligned reads were used for analysis. Visualization of the reads at functional genomic regions was obtained using D-peaks.<sup>32</sup>

**We studied the presence of H3K4me3 marks and open chromatin domain by ATAC-seq.**

ATAC-seq sample preparation was adapted from <sup>33</sup> (Buenrostro, Giresi et al. 2013). Endometrial stromal cells were harvested by trypsinization. After counting,  $5 \times 10^4$  cells were washed with 50 $\mu$ l cold PBS followed by 50 $\mu$ l cold lysis buffer (10mM Tris-HCl, pH 7.4; 10mM NaCl; 3mM MgCl<sub>2</sub>; 0.1% NP40) to prepare nuclei. Nuclei were resuspended in 50 $\mu$ l transposase reaction mix (from Illumina Nextera DNA Sample Preparation kit, Cat. FC-121-1030: 25 $\mu$ l 2x TD Buffer; 2.5 $\mu$ l Transposase; 22.5 $\mu$ l nuclease-free water) and incubated for 30 min at 37°C to allow transposition of sequencing adapters into open chromatin. Transposed sample (“tagmented” DNA) was purified using Qiagen MinElute Reaction Clean-up kit (Cat. 28204), and PCR amplified for an average of 10 cycles using NEBNext High-Fidelity 2x PCR Master Mix (NEB Cat. M0541S) and Nextera Index Primers (Illumina Cat. FC-121-1011). To avoid amplification biases arising from limiting conditions, the optimum number of PCR cycles for each sample was determined as follows: the PCR reaction was stopped at 5 cycles; an aliquot of the reaction was used as the template for qPCR reaction with the same reaction conditions but with the addition of SYBR Green I dye; the cycle at which the rate of reaction begins to drop after hitting a peak was determined, and used to calculate the additional number of cycles necessary for library amplification. Amplified library was purified with Qiagen MinElute PCR Purification kit (Cat. 28004). The library was sequenced at Yale Center for Genome Analysis on Illumina HiSeq 2500 without multiplexing to get  $\sim 2 \times 10^8$  paired-end reads of 75bp.

**We performed electrophoretic mobility shift assays (EMSA)** to determine whether the polymorphism at the *WNT4* locus differentially affected estrogen receptor alpha binding. Human endometrial stromal fibroblasts (T HESC, obtained from Gill lab, Yale University, corresponding to ATCC CRL-4003) were cultured at 37°C and 5% CO<sub>2</sub> in DMEM supplemented with 10% fetal bovine serum (Gemini), 1% L-Glutamine, and 1% antibiotic/antimycotic (ABAM; GIBCO). To induce decidualization, the cells were treated for 72 hours with DMEM supplemented with 2% fetal bovine serum (Gemini), 0.5mM 8-Br-cAMP (Sigma), 1 $\mu$ M of the progesterone analog, medroxy-progesterone acetate (MPA), and 10nM estradiol (Sigma).

We prepared nuclear protein extracts based on Miller DE et al.<sup>34</sup> with minor modifications. Decidualized T HESC cells were trypsinized, washed twice with cold PBS, counted,

resuspended in PBS as  $10^7$  cells/ml, then centrifuged 3300xg for 2min, 4°C. PBS was removed and  $10^7$  cells were resuspended in 400µl CE buffer (10mM HEPES (pH7.9)), 10mM KCl, 0.1mM EDTA, 1mM dithiothreitol (DTT), and 1X HALT protease/phosphatase inhibitor (ThermoFisher)), then incubated on ice for 15 minutes. Cells were mixed with 25µl of 10% Nonidet P-40 by pipetting, and then nuclei were pelleted at maximum speed for 3min, 4°C. Nuclei were resuspended in 30µl NE buffer (20mM HEPES (pH7.9), 0.4M NaCl, 1mM EDTA, 1mM DTT, 1X protease/phosphatase inhibitor) by vortexing, incubated on ice for 10min, then centrifuged 3300x g for 2min, 4°C. Supernatants (nuclear proteins) were removed from pelleted debris and stored in small aliquots at -80°C. Protein concentration was determined by BCA.

Double-stranded IRDye700 5' end-labelled 41bp oligonucleotides, identical except for the nucleotide at rs3820282, being either "C" or "T", were obtained from IDT. The oligo sequence of the more common "C" allele is:

5' -IRDye700/GCCTGGAGGGCTCTGGCTGGCCACAATGACCTCATAGCAAC-3'.

The less common "T" allele oligo sequence is:

5' -IRDye700/GCCTGGAGGGCTCTGGCTGGTCACAATGACCTCATAGCAAC-3'.

DNA binding reaction buffer contained: 1x binding buffer, 1x DTT/Tw20, 1µg poly(dI-dC), 0.05% NP-40 (LI-COR EMSA buffer kit), 1mM zinc acetate and 10nM estradiol (Sigma). Binding reactions with nuclear extract (prepared as above) contained 12µg nuclear protein. Binding reactions with purified full-length bioactive human estrogen receptor alpha protein (ThermoFisher #A15674) contained 10ng purified protein. The HESC extracts were supplemented with purified ESR1 as, while endogenous ESR1 mRNA is present in these cells, its low abundance (approximately 5-6 TPM) limits the sensitivity of measuring endogenous estrogen receptor binding in this biologically relevant context. 50fmol fluorescent oligo DNAs were then added to the appropriate protein/binding mix and incubated for 20min at room temp. For supershift assays, 200ng rabbit monoclonal estrogen receptor alpha antibody (Cell Signaling #8644) was incubated with the nuclear lysate/binding buffer for 20min prior to addition of and incubation with oligo DNA. 1x orange loading dye (LI-COR kit) was added to samples, which were then resolved on (pre-cast, pre-run at 100V for 60min) 6% TBE gels (Novex, ThermoFisher) in 0.5x TBE buffer for 80min at 80V (room temp). Fluorescent bands were then imaged using a LI-COR chemiluminescent imaging system. EMSA experiments display representative panels of 2-3 replicates.

## Supplementary Figures

**Figure S1. Histogram of self-reported gestational age in the 23andMe data set**

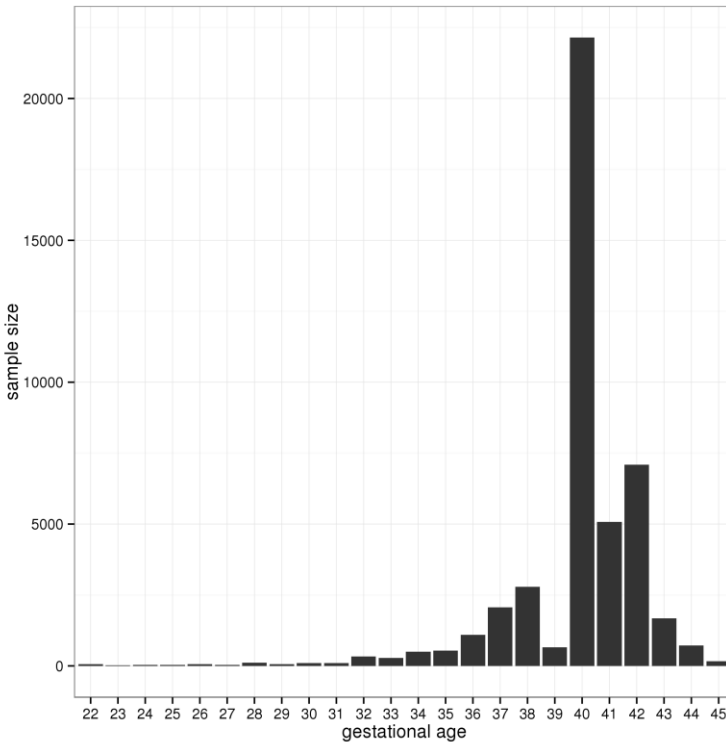

The under-representation of women reporting 39 weeks of gestation reflects the survey structure. Women were first asked whether their delivery was “more than a week before my due date”, “within a week of my due date”, or “more than a week after my due date”. Women who answered “within a week of my due date” were assigned a gestational age of 40 weeks. Women who answered other than “within a week of my due date” were asked a follow-up question to determine weeks of gestation.

**Figure S2. Distribution of gestational length in the three Nordic data sets (Top:FIN; Middle:MoBa; Bottom: DNBC)**

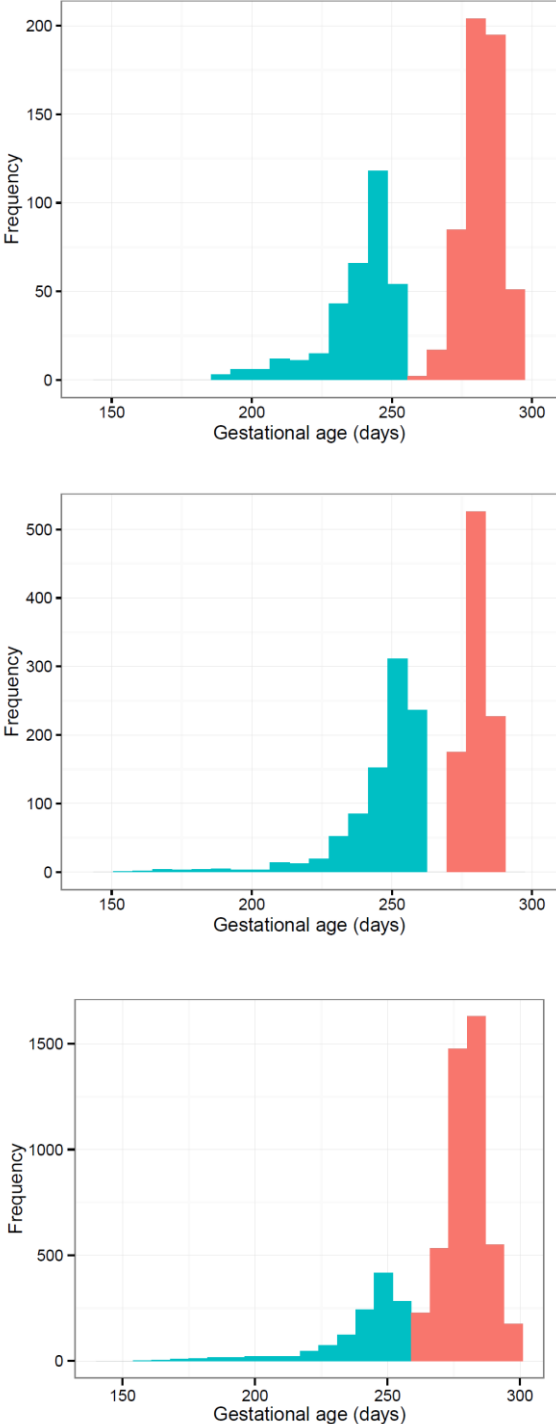

The histograms of gestational length in the three Nordic data sets. Gestational length in term and preterm samples were showed respectively in red and blue.

Figure S3. QQ plot of GWA results (discovery phase)

A.

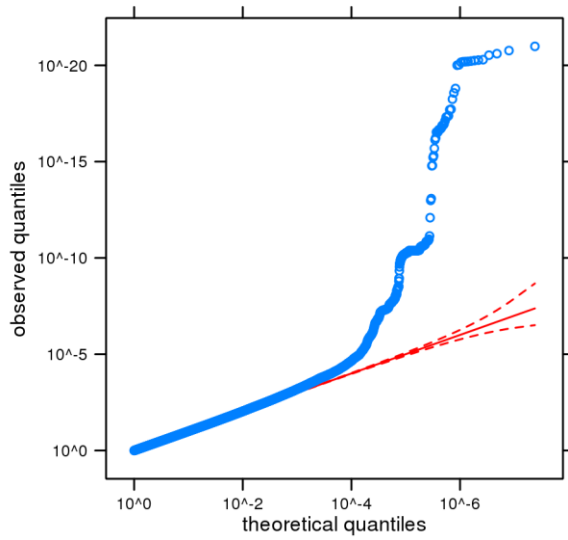

Lambda=1.038

B.

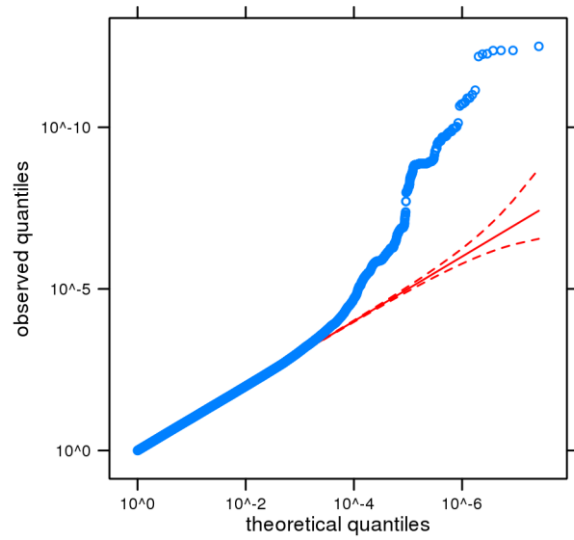

Lambda=1.025

**Figure S4. Correlation between effect sizes estimated from mothers and infants (replication phase)**

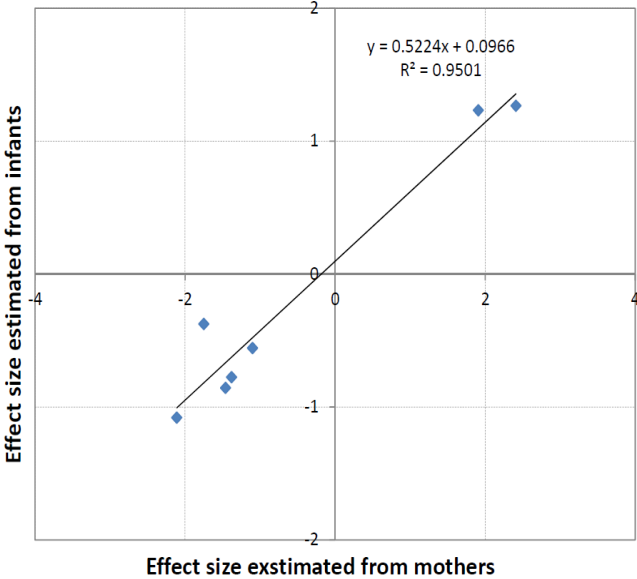



## Figure S5. Regional plots of genomic loci associated with gestational age

Top: showing the primary association; Bottom: showing the secondary association after accounting for the primary association. The rs number and  $P$ -value of the most significant primary or secondary SNP were labeled on top of the SNP.  $r^2$  between each SNP and the most significant SNP was color coded.

### A. *EBF1* locus

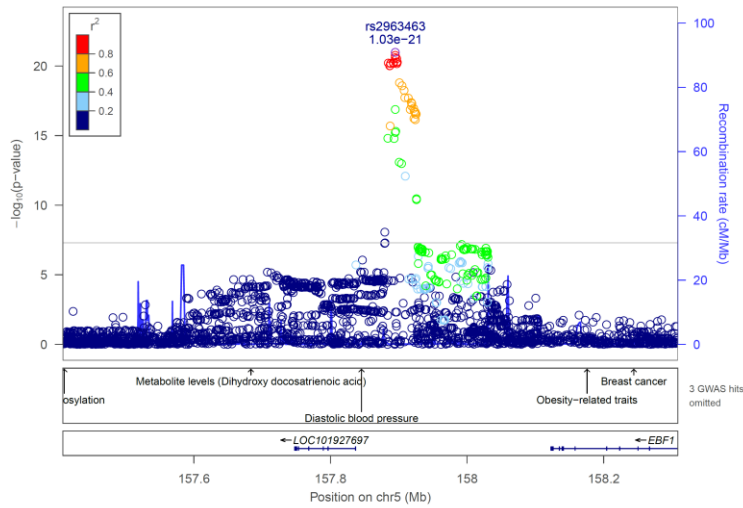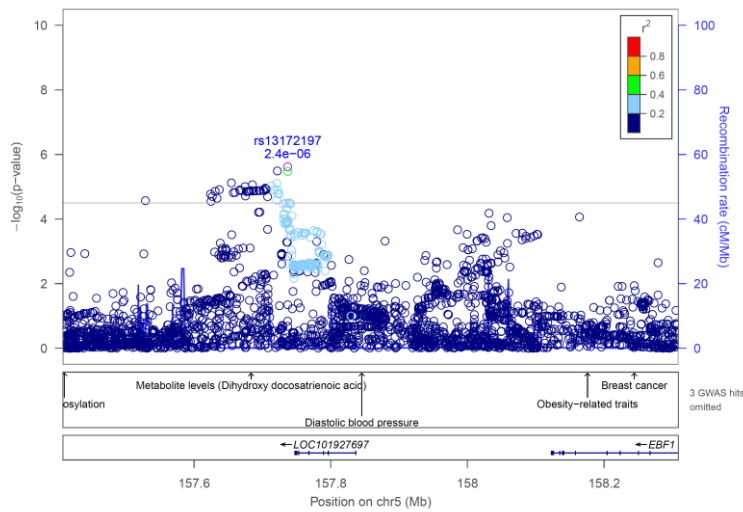

## B. *EEFSEC* locus

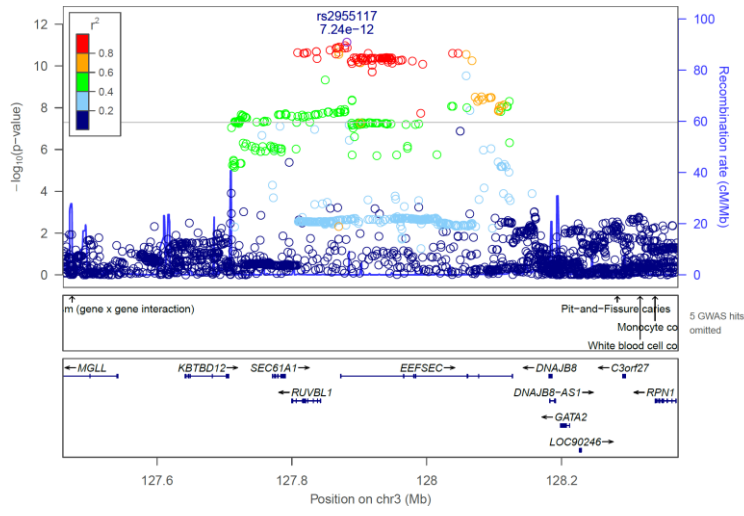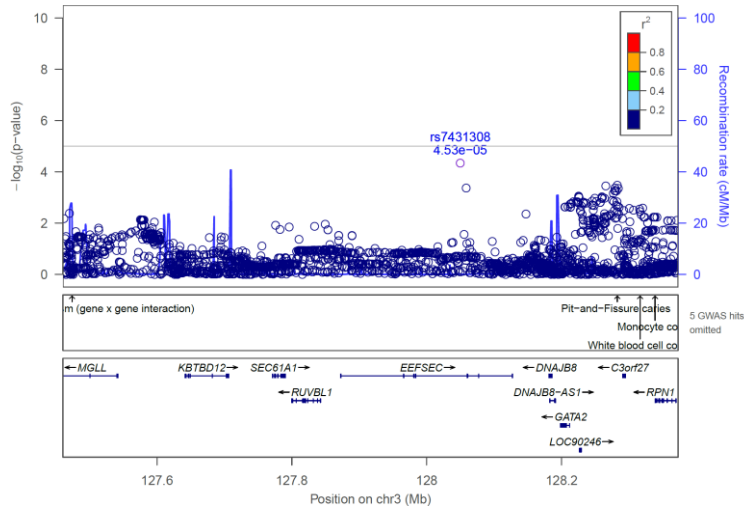

### C. *AGTR2* locus

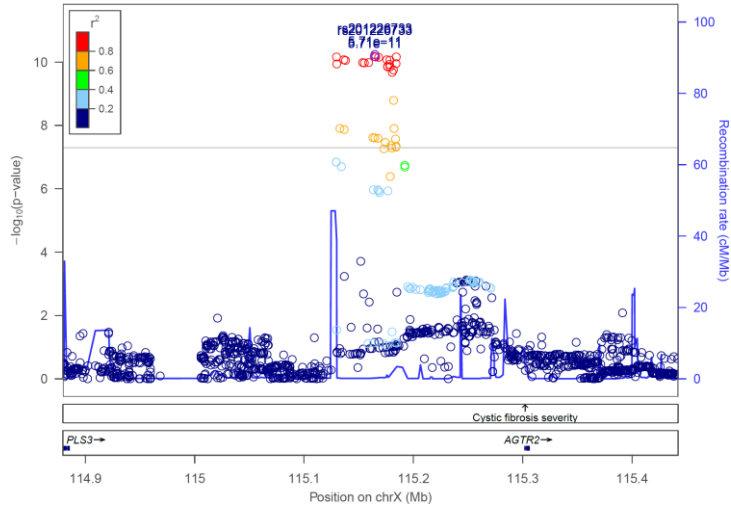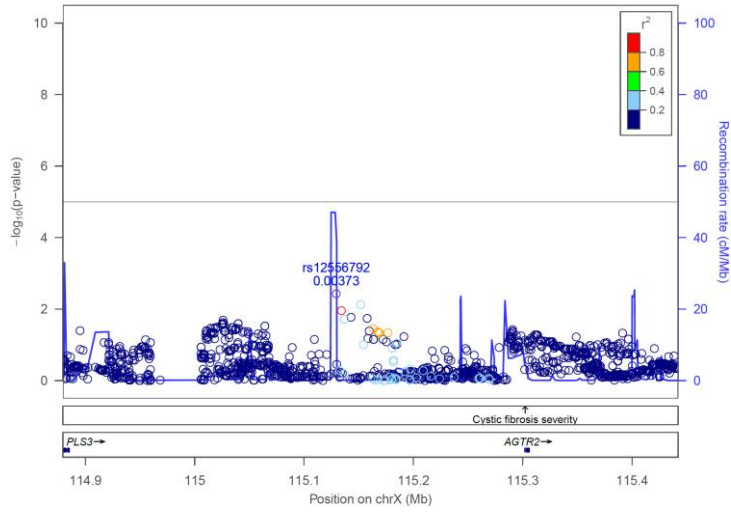

### D. WNT4 locus

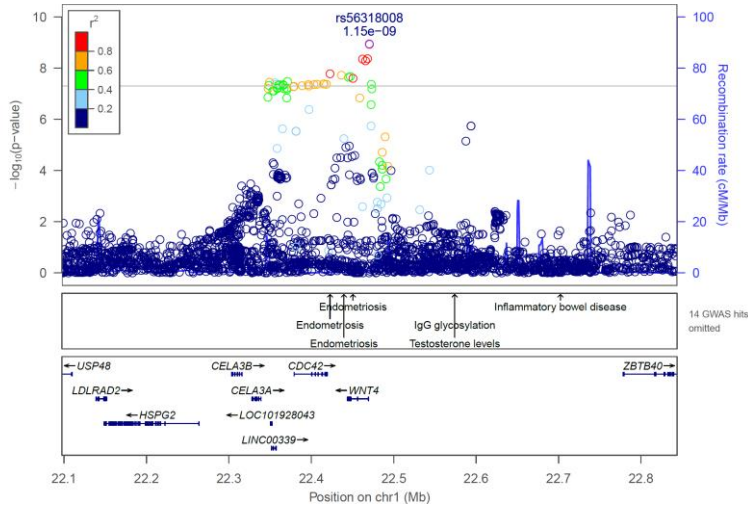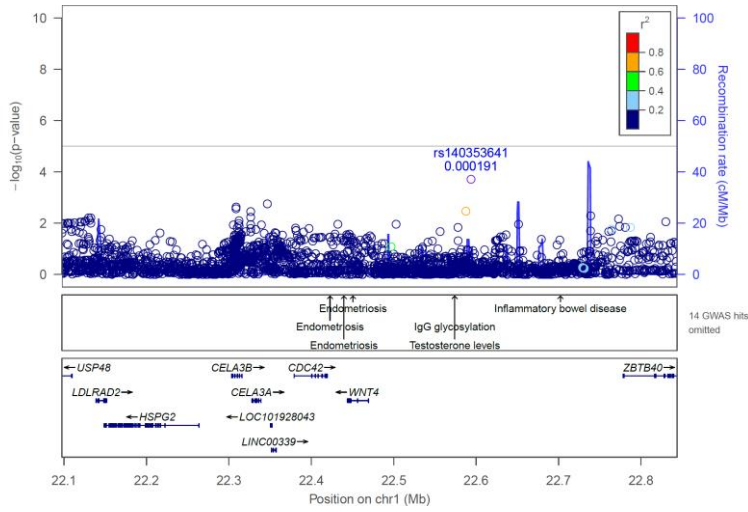

### E. *ADCY5* locus

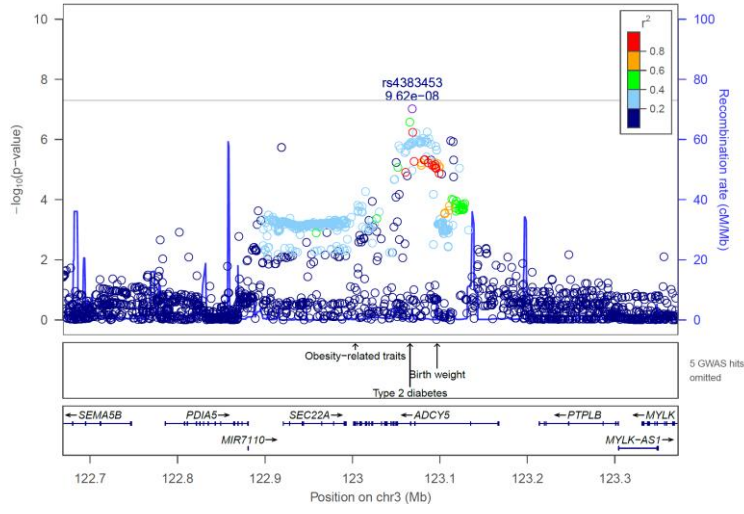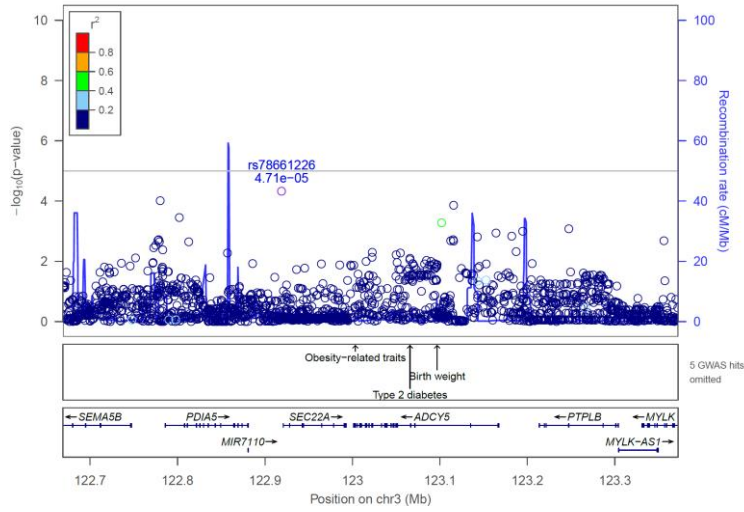

## F. *RAP2C* locus

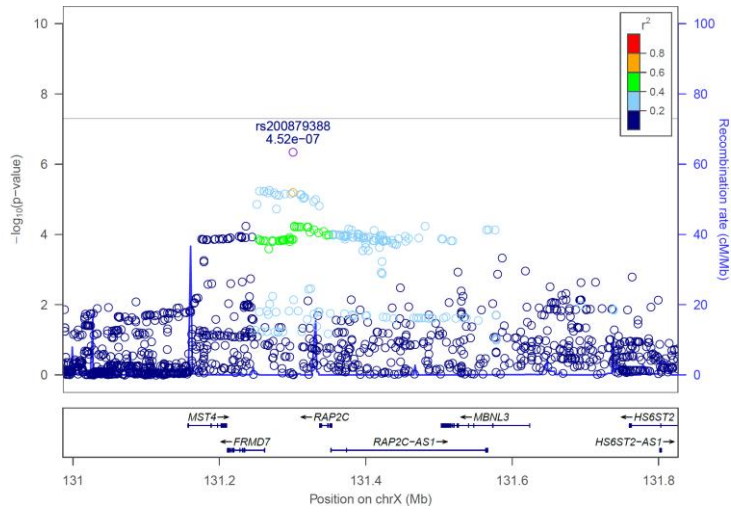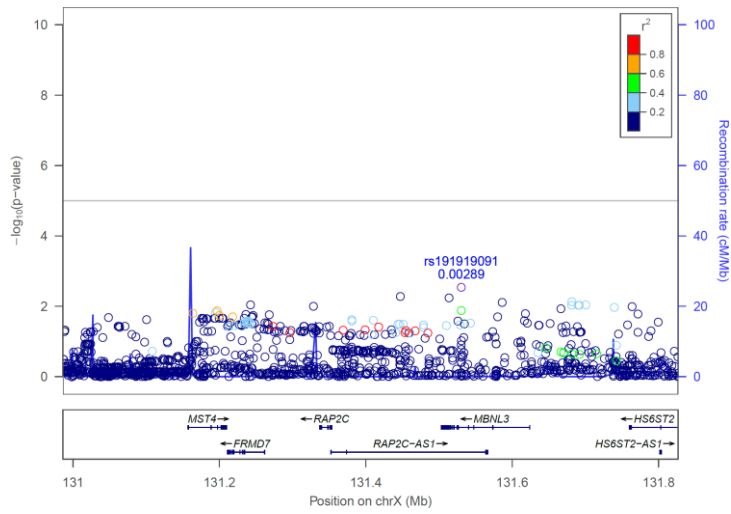

### G. *BOLA3* locus

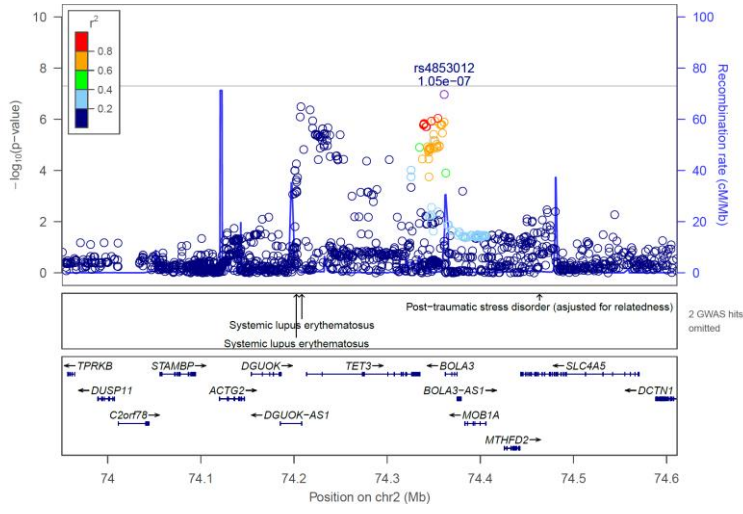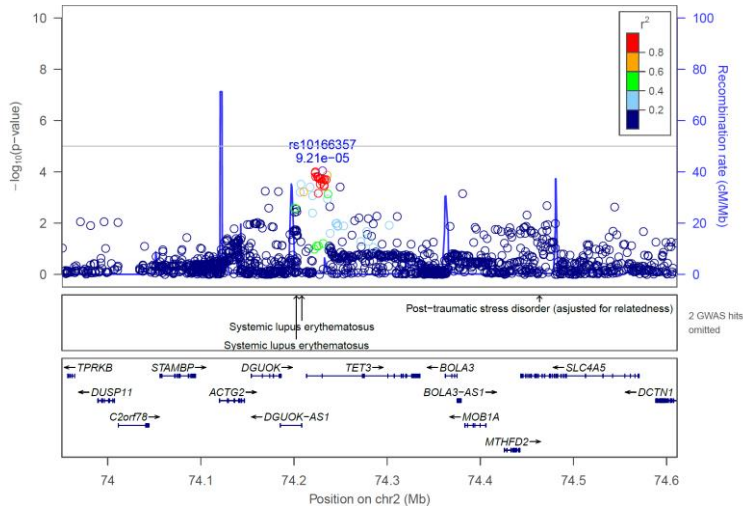

## Figure S6. Regional plots of genomic loci associated with preterm birth

(top: showing the primary association; bottom: showing the secondary association after accounting for the primary association)

### A. *EBF1* locus

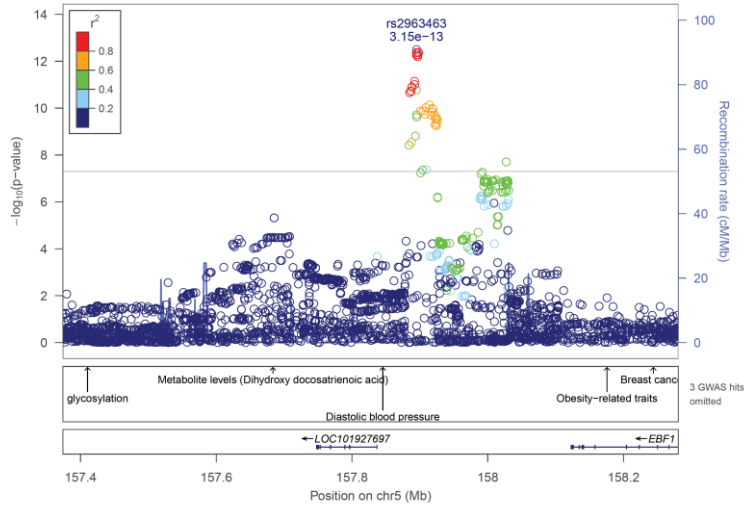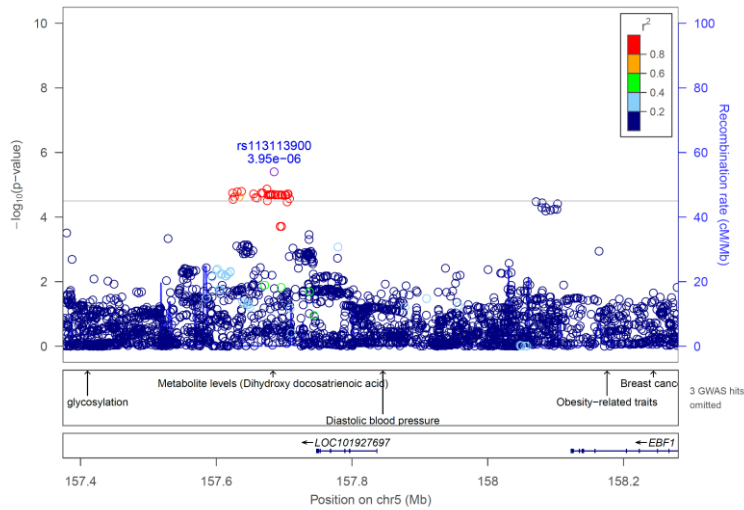



## B. *EEFSEC* locus

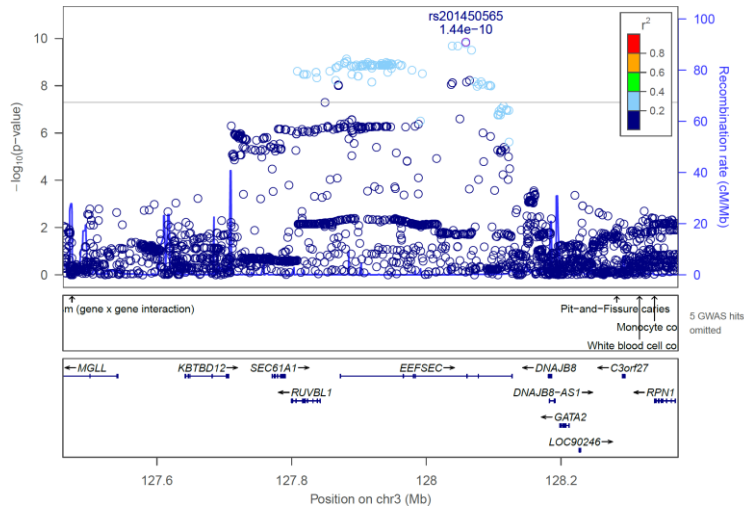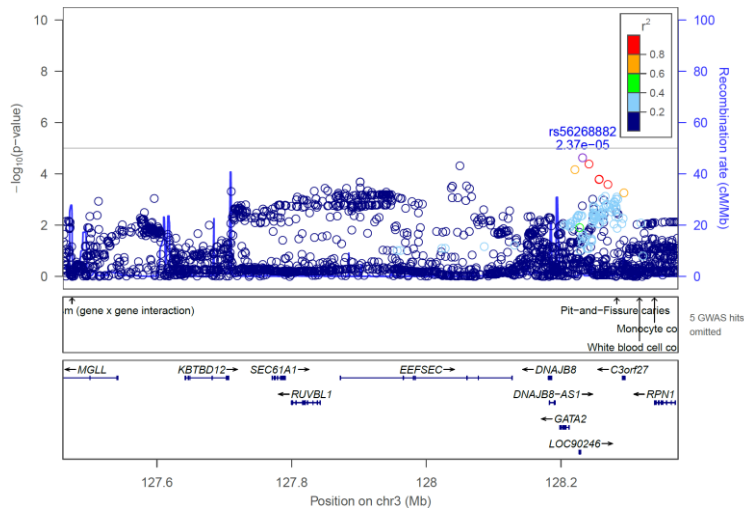

### C. *AGTR2* locus

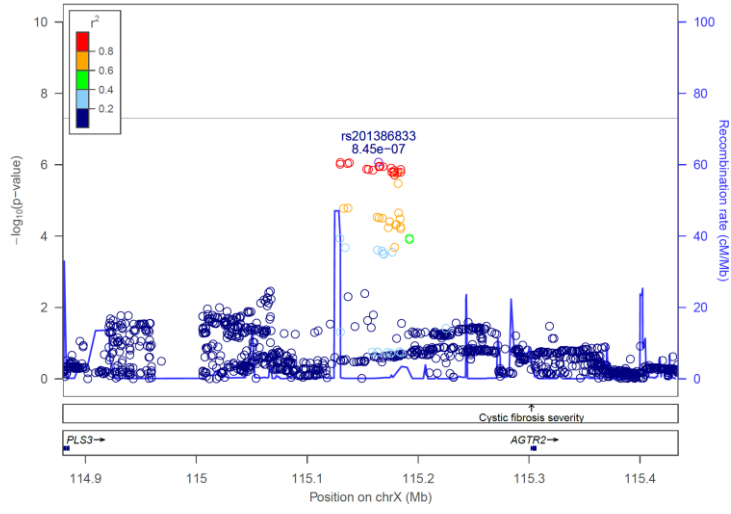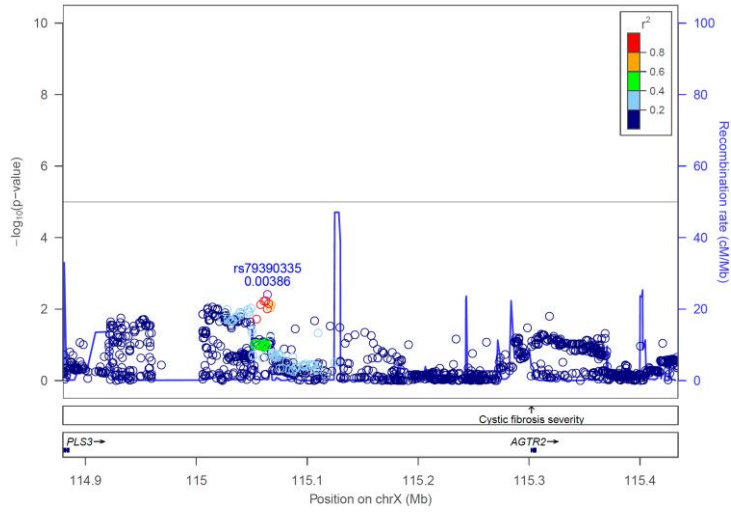

### D. *TEKT3* locus

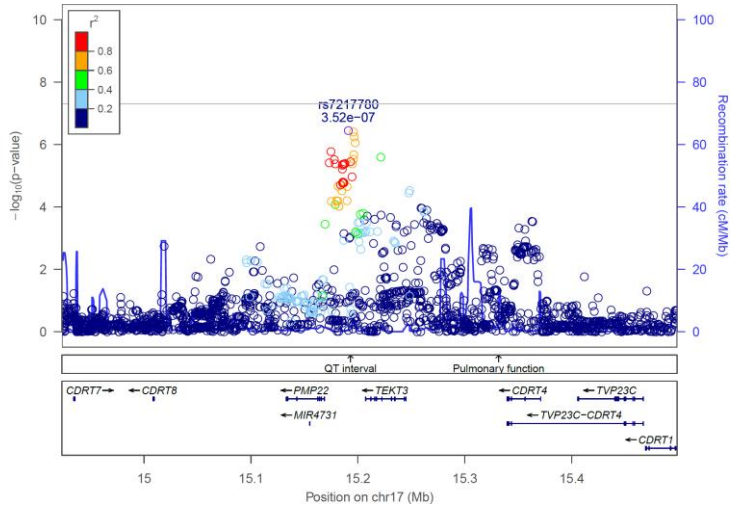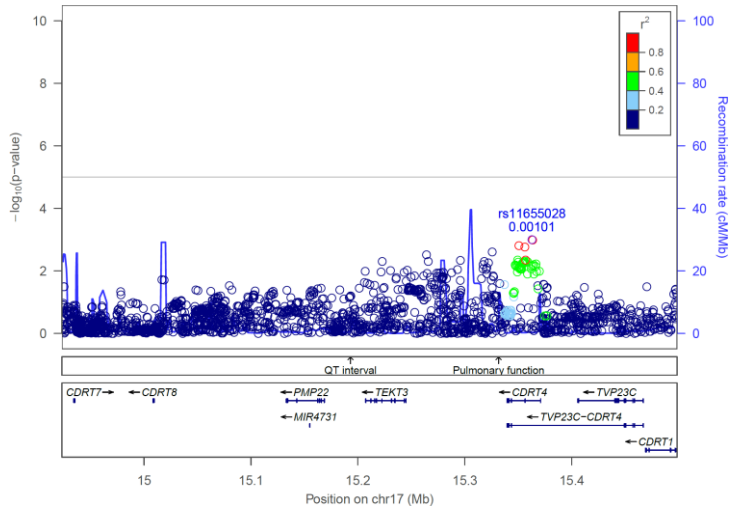

### E. *TGFB1* locus

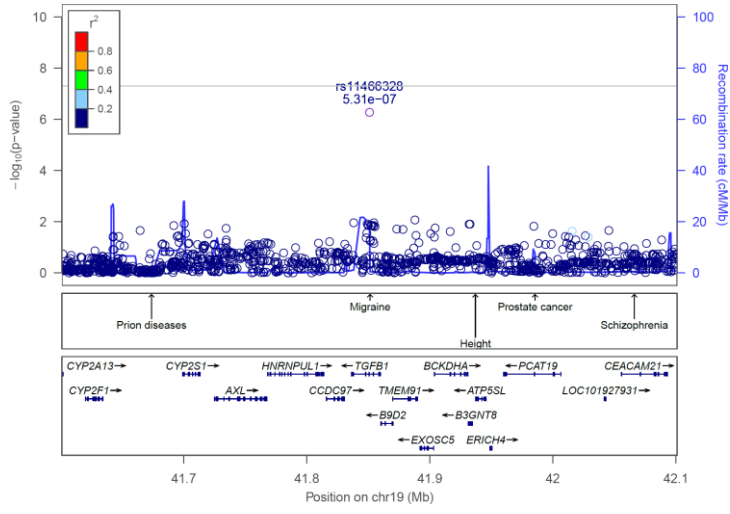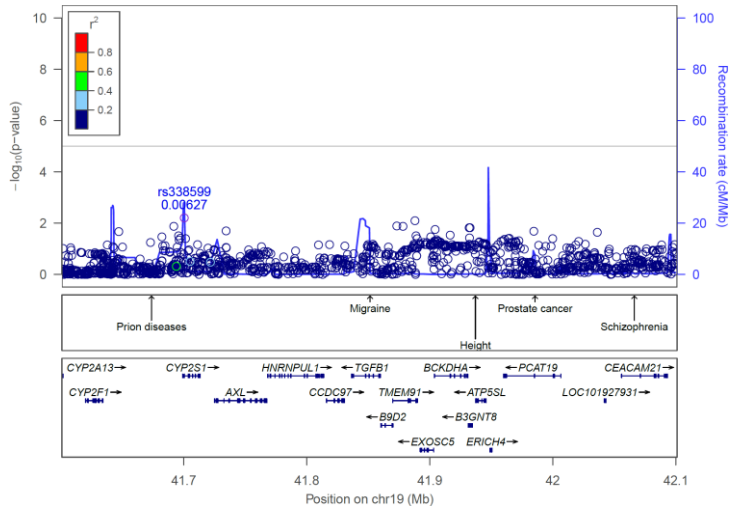

**Figure S7. Variance explained in the replication studies using associated SNPs**

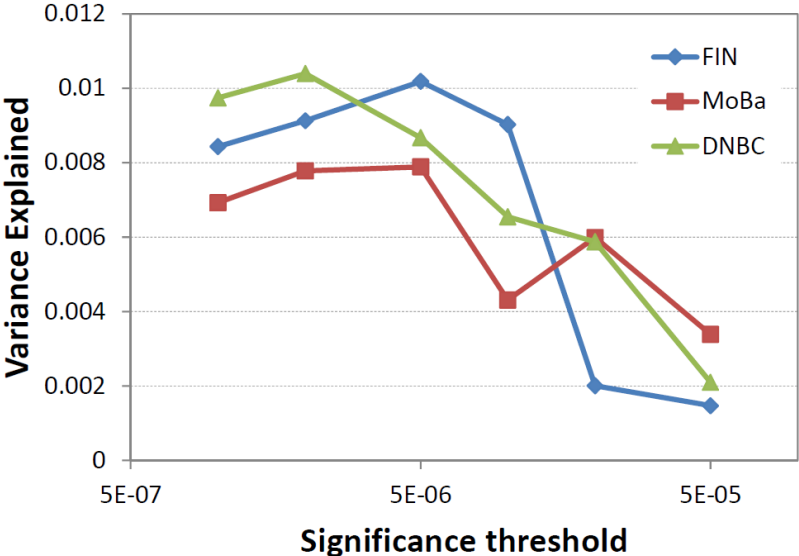

**Figure S8. Manhattan plot of gene-wise association  $P$  values**

**A. Gestational age**

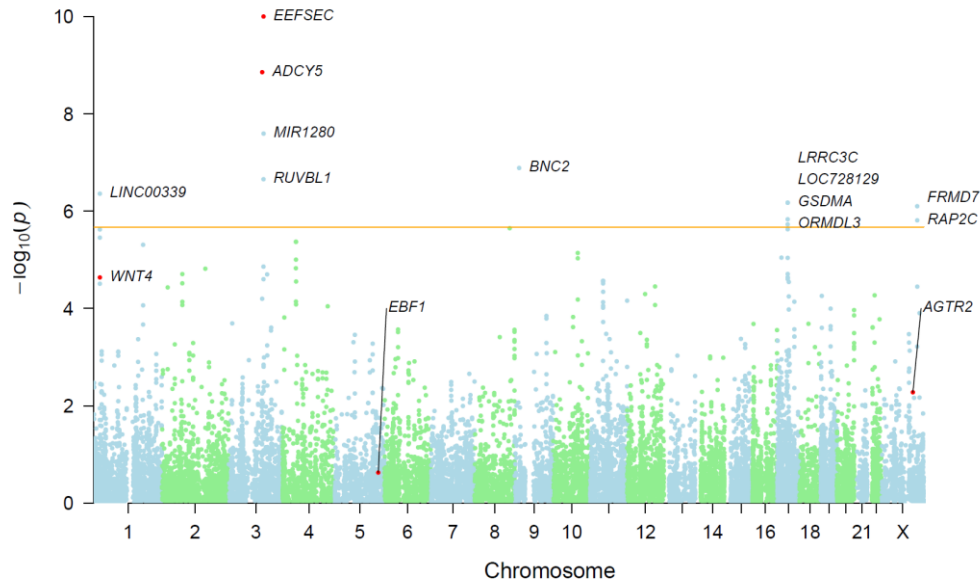

**B. Preterm birth**

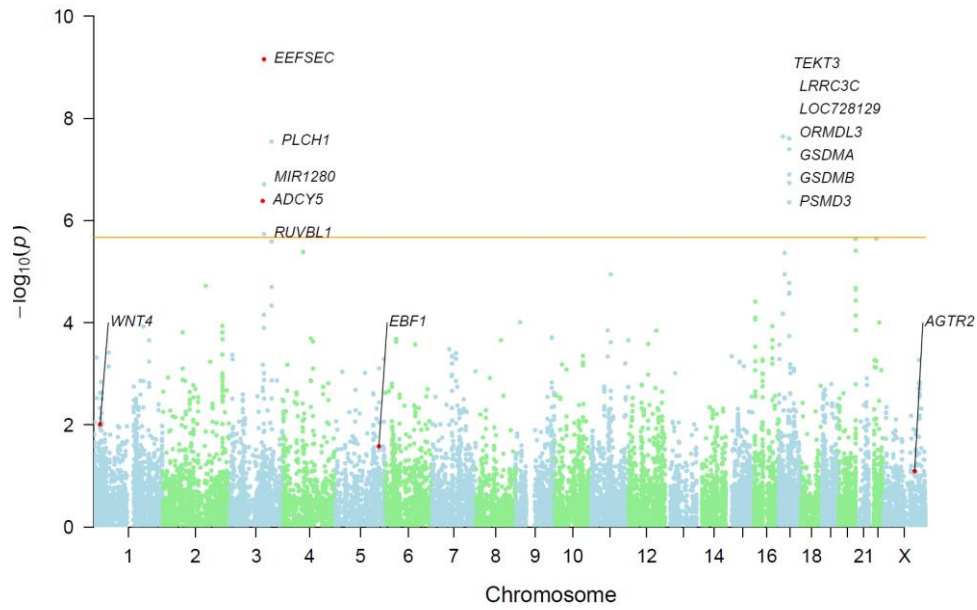

**Figure S9. Gene set enrichment analysis showing enrichment of association signals in genes implicated in pregnancy related biological terms**

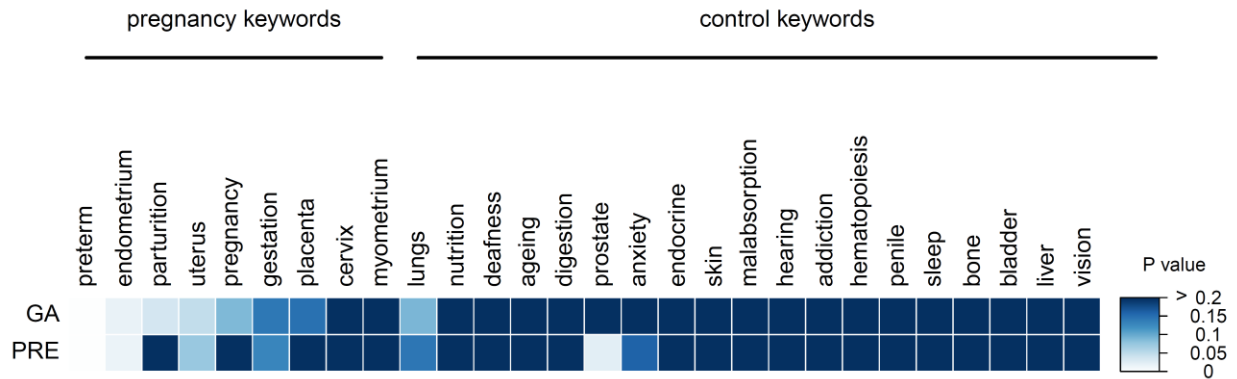

Enrichment of association signals (GA: gestational length; PRE: preterm birth) in gene sets related to 28 biological terms, including 9 pregnancy terms (left) and 19 “control” terms (right). For each biological term, we first constructed a set of genes related to that term by searching PubMed and then summarized the genomewide association SNP-level *P*-values in this set of genes into a gene-set-level *P* value (color-coded) using MAGMA.

## Supplementary Tables

**Table S1. Study datasets**

| Data set                   | Sample        | Term        | Preterm     | Unclassified* | Total       |
|----------------------------|---------------|-------------|-------------|---------------|-------------|
| <i>Discovery data set</i>  |               |             |             |               |             |
| 23andMe®                   |               |             |             |               |             |
|                            | Mother        | 40236       | 3331        |               | 43568       |
|                            |               |             |             |               |             |
| <i>Replication studies</i> |               |             |             |               |             |
| FIN                        |               |             |             |               |             |
|                            | Mother        | 554         | 334         | 0             | 888         |
|                            | <i>Infant</i> | <i>564</i>  | <i>253</i>  | <i>0</i>      | <i>817</i>  |
| MoBa                       |               |             |             |               |             |
|                            | Mother        | 928         | 906         | 0             | 1834        |
|                            | <i>Infant</i> | <i>593</i>  | <i>550</i>  | <i>0</i>      | <i>1143</i> |
| DNBC                       |               |             |             |               |             |
|                            | Mother        | 4552        | 1325        | 44            | 5921        |
|                            | <i>Infant</i> | <i>1015</i> | <i>1115</i> | <i>0</i>      | <i>2130</i> |
| Total                      |               |             |             |               |             |
|                            | Mother        | 6034        | 2565        | 44            | 8643        |
|                            | <i>Infant</i> | <i>2172</i> | <i>1918</i> | <i>0</i>      | <i>4090</i> |

@ For preterm birth, our procedure attempted to maximize study power by preferentially retaining individuals with in case (preterm) group. For a continuous outcome (gestational age), our procedure attempted to keep as many unrelated people in the analysis as possible. This does mean that slightly different sets of women were included in the two analyses (the overlap is 99.8%). The total number shown here (N=43,568) was the number of discovery samples included in the analysis of gestational age.

\* In the replication studies, individuals with gestational age between 36 and 37 weeks were categorized as “unclassified”. These individuals were included in the analysis of gestational age as a quantitative trait but excluded in the analysis of preterm birth as a dichotomous trait.



**Table S2. Phenotype data of discovery samples (23andMe)**

| Phenotype              | Age at pregnancy |         |         |         |         |         |         | Total |
|------------------------|------------------|---------|---------|---------|---------|---------|---------|-------|
|                        | (0,18]           | (18,20] | (20,25] | (25,30] | (30,35] | (35,40] | (40,60] |       |
| <i>Gestational wks</i> |                  |         |         |         |         |         |         |       |
| [22,37]*               | 318              | 522     | 1426    | 1493    | 1035    | 338     | 69      | 5201  |
| (37,40]                | 1374             | 2472    | 7239    | 7243    | 4305    | 1437    | 281     | 24351 |
| (40,41]                | 326              | 575     | 1532    | 1353    | 750     | 238     | 45      | 4819  |
| (41,42]                | 406              | 820     | 2292    | 1940    | 964     | 301     | 40      | 6763  |
| (42,45]                | 196              | 362     | 1017    | 590     | 215     | 43      | 11      | 2434  |
| Total                  | 2620             | 4751    | 13506   | 12619   | 7269    | 2357    | 446     | 43568 |
| <i>Preterm status</i>  |                  |         |         |         |         |         |         |       |
| Preterm                | 227              | 407     | 930     | 931     | 611     | 189     | 36      | 3331  |
| Normal term            | 2387             | 4346    | 12581   | 11686   | 6655    | 2170    | 411     | 40236 |
| Total                  | 2614             | 4753    | 13511   | 12617   | 7266    | 2359    | 447     | 43567 |

\* The number of individuals in the group with gestational wks [22, 37] (N=5,201) is larger than the number of individuals in the preterm group (N=3,331) because the former one includes 1,870 mothers with gestational wks = 37.

**Table S3. Influences of co-variates in discovery samples***Gestational age*

| <b>Covariate#</b> | <b>Estimate</b> | <b>s.e.</b> | <b>t value*</b> | <b>P-value</b>        |
|-------------------|-----------------|-------------|-----------------|-----------------------|
| Age at pregnancy  | -0.02860        | 0.00212     | -13.5           | 2.3×10 <sup>-41</sup> |
| pc.0              | -0.01834        | 0.01193     | -1.5            | 0.12                  |
| pc.1              | -0.01136        | 0.01188     | -1.0            | 0.34                  |
| pc.2              | -0.03916        | 0.01186     | -3.3            | 0.00097               |
| pc.3              | -0.02635        | 0.01187     | -2.2            | 0.026                 |
| pc.4              | -0.02537        | 0.01185     | -2.1            | 0.032                 |
| v2_platformv2     | 0.00647         | 0.06019     | 0.1             | 0.91                  |
| v3_1_platformv3.1 | 0.012           | 0.03257     | 0.4             | 0.71                  |
| v4_platformv4     | -0.01168        | 0.03207     | -0.4            | 0.72                  |

*Preterm birth*

| <b>Covariate</b>  | <b>Estimate</b> | <b>s.e.</b> | <b>LRT*</b> | <b>P-value</b> |
|-------------------|-----------------|-------------|-------------|----------------|
| Age at pregnancy  | 0.00201         | 0.00323     | 0.4         | 0.53           |
| pc.0              | 0.03238         | 0.01934     | 2.9         | 0.089          |
| pc.1              | -0.00910        | 0.0183      | 0.2         | 0.62           |
| pc.2              | 0.03334         | 0.01814     | 3.3         | 0.068          |
| pc.3              | 0.02746         | 0.01842     | 2.2         | 0.14           |
| pc.4              | 0.02521         | 0.0187      | 1.9         | 0.17           |
| v2_platformv2     | -0.09468        | 0.09468     | 1           | 0.31           |
| v3_1_platformv3.1 | 0.00369         | 0.0495      | 0           | 0.94           |
| v4_platformv4     | -0.01855        | 0.04887     | 0.1         | 0.7            |

# pc.0 – pc.4: first 5 components in PCA analysis. v2\_platformv2, v3\_1\_platformv3.1 and v4\_platformv4 are indicator variables for different genotyping platforms.

\* Linear regression and Student's t-test was used to examine the influences of co-variates on gestational age as a quantitative trait. Logistic regression and likelihood ratio test (LRT) was used to examine the influences of co-variates on preterm birth as a dichotomous trait.

**Table S4. Influence of covariates on gestational age (replication studies)**

| Covariate       | FIN    |       |          | MoBa   |       |          | DNBC <sup>#</sup> |       |          | Meta <sup>*</sup> |       |          |
|-----------------|--------|-------|----------|--------|-------|----------|-------------------|-------|----------|-------------------|-------|----------|
|                 | beta   | se    | <i>P</i> | beta   | se    | <i>P</i> | beta              | se    | <i>P</i> | beta              | se    | <i>P</i> |
| Maternal age    | 0.183  | 0.176 | 0.296    | 0.287  | 0.138 | 0.037    | -0.011            | 0.135 | 0.935    | 0.146             | 0.084 | 0.084    |
| Infant gender   | 3.831  | 1.584 | 0.016    | 2.333  | 0.963 | 0.016    | 1.959             | 1.132 | 0.084    | 2.468             | 0.666 | 2.1E-4   |
| Maternal height | 0.333  | 0.144 | 0.021    | 0.476  | 0.086 | 2.99E-08 | 0.248             | 0.098 | 0.012    | 0.371             | 0.059 | 3.1E-10  |
| Maternal weight | -0.113 | 0.073 | 0.124    | -0.019 | 0.041 | 0.639    | 0.054             | 0.047 | 0.256    | -0.007            | 0.029 | 0.811    |

# Results from a subset of 1815 DNBC women corresponding to the original GENEVA preterm birth study are presented. In the rest DNBC samples some covariates were confounded due to the sample selection procedure.

\*Meta shows the combined results from the three studies using fixed-effect meta-analysis.

**Table S5. Suggestive GWA regions (discovery phase)**

| No                     | Chr | From      | To        | Length (kb) | Gene          | Markers@ | Association# |     |     |          | Functional& |    | GWAS* |    |
|------------------------|-----|-----------|-----------|-------------|---------------|----------|--------------|-----|-----|----------|-------------|----|-------|----|
|                        |     |           |           |             |               |          | Sig          | +LD | Eff | P.cut\$  | All         | LD | All   | LD |
| <i>Gestational age</i> |     |           |           |             |               |          |              |     |     |          |             |    |       |    |
| 1                      | 5   | 157408195 | 158308569 | 900         | <i>EBF1</i>   | 2897     | 119          | 125 | 18  | 1.98E-04 | 1           | 0  | 11    | 0  |
| 2                      | 3   | 127460474 | 128372820 | 912         | <i>EEFSEC</i> | 2554     | 255          | 279 | 33  | 1.08E-04 | 4           | 0  | 133   | 4  |
| 3                      | X   | 114879442 | 115442159 | 563         | <i>AGTR2</i>  | 1313     | 41           | 41  | 9   | 3.97E-04 | 0           | 0  | 3     | 0  |
| 4                      | 1   | 22097396  | 22843805  | 746         | <i>WNT4</i>   | 3015     | 46           | 47  | 13  | 2.75E-04 | 29          | 0  | 16    | 3  |
| 5                      | 3   | 122668928 | 123372314 | 703         | <i>ADCY5</i>  | 2091     | 7            | 44  | 7   | 5.10E-04 | 3           | 0  | 10    | 0  |
| 6                      | 2   | 73950833  | 74611290  | 660         | <i>BOLA3</i>  | 1489     | 5            | 22  | 5   | 7.14E-04 | 7           | 0  | 4     | 0  |
| 7                      | 9   | 16149953  | 16719213  | 569         | <i>BNC2</i>   | 2134     | 6            | 13  | 6   | 5.95E-04 | 3           | 0  | 8     | 0  |
| 8                      | 1   | 91984421  | 92490753  | 506         | <i>TGFBR3</i> | 1891     | 2            | 2   | 2   | 1.79E-03 | 6           | 0  | 6     | 0  |
| 9                      | 9   | 101806013 | 102324119 | 518         | <i>SEC61B</i> | 1419     | 7            | 7   | 2   | 1.79E-03 | 3           | 0  | 6     | 0  |
| 10                     | 6   | 30552017  | 31173629  | 622         | <i>SFTA2</i>  | 5073     | 1            | 4   | 2   | 1.79E-03 | 141         | 0  | 64    | 0  |
| 11                     | X   | 130986215 | 131826714 | 840         | <i>RAP2C</i>  | 1285     | 1            | 1   | 1   | 3.57E-03 | 3           | 0  | 0     | 0  |
| 12                     | 10  | 28061621  | 28598815  | 537         | <i>MPP7</i>   | 1870     | 1            | 8   | 2   | 1.79E-03 | 5           | 0  | 6     | 0  |
| <i>Preterm birth</i>   |     |           |           |             |               |          |              |     |     |          |             |    |       |    |
| 1                      | 5   | 157374012 | 158280813 | 907         | <i>EBF1</i>   | 2983     | 102          | 114 | 15  | 2.38E-04 | 0           | 0  | 11    | 0  |
| 2                      | 3   | 127460474 | 128373786 | 913         | <i>EEFSEC</i> | 2557     | 191          | 241 | 25  | 1.43E-04 | 4           | 0  | 133   | 4  |
| 3                      | 17  | 14923221  | 15498449  | 575         | <i>TEKT3</i>  | 2043     | 4            | 16  | 6   | 5.95E-04 | 10          | 0  | 2     | 1  |
| 4                      | 19  | 41601042  | 42101042  | 500         | <i>TGFB1</i>  | 1457     | 1            | 1   | 1   | 3.57E-03 | 32          | 0  | 7     | 0  |
| 5                      | X   | 114879714 | 115434372 | 555         | <i>AGTR2</i>  | 1292     | 5            | 22  | 5   | 7.14E-04 | 0           | 0  | 3     | 0  |

@: the total number of SNPs (MAF > 1%) in the region.

#: the number of association SNPs identified by discovery phase. **Sig**: number of SNPs with  $P < 1 \times 10^{-6}$ ; **+LD**: number of SNPs with  $P < 1 \times 10^{-6}$  and their close proxies ( $r^2 > 0.8$ ); and **Eff**: the estimated “effective number of independent SNPs”, which was used in Bonferroni correction for multiple testing.

§: *P*.cut: the Bonferroni corrected significance level for each region, calculated as  $0.05 / \text{Eff}$  (effective number of independent SNPs) / number of regions (=14)

&: number of “functional” (including missense, nonsense, frame-shift and splicing) SNPs. **All**: all “functional” SNPs in the region; **LD**: number of “functional” SNPs which are in close LD ( $r^2 > 0.8$ ) with the “Association” SNPs.

\*: number of GWA SNPs by GWAS Catalog (V1.0.1, r2017-01-09). **All**: all GWA SNPs in the region; **LD**: number of GWA SNPs which are in close LD ( $r^2 > 0.8$ ) with the “Association” SNPs.

**Table S6. Association results obtained from “spontaneous only” and the full discovery data set.**

| Chr                    | Genes         | SNP Information |           |     | Original <sup>@</sup> |        |          | Spontaneous only <sup>#</sup> |        |          |
|------------------------|---------------|-----------------|-----------|-----|-----------------------|--------|----------|-------------------------------|--------|----------|
|                        |               | rs              | pos       | A/G | freq                  | eff    | <i>P</i> | freq                          | eff    | <i>P</i> |
| <i>Gestational age</i> |               |                 |           |     |                       |        |          |                               |        |          |
| 5                      | <b>EBF1</b>   | rs2963463       | 157895049 | C/T | 0.272                 | -1.29  | 1.03E-21 | 0.272                         | -1.207 | 5.01E-28 |
| 3                      | <b>EEFSEC</b> | rs2955117       | 127881613 | G/A | 0.286                 | 0.911  | 7.24E-12 | 0.286                         | 0.604  | 2.33E-08 |
| X                      | <b>AGTR2</b>  | rs201226733     | 115164770 | D/I | 0.578                 | 0.82   | 5.71E-11 | 0.579                         | 0.701  | 5.63E-12 |
| 1                      | <b>WNT4</b>   | rs56318008      | 22470407  | C/T | 0.139                 | 1.05   | 1.15E-09 | 0.140                         | 0.926  | 4.61E-11 |
| 3                      | <b>ADCY5</b>  | rs4383453       | 123068359 | G/A | 0.2                   | -0.808 | 9.62E-08 | 0.199                         | -0.622 | 4.64E-07 |
| 2                      | <i>BOLA3</i>  | rs4853012       | 74361290  | G/A | 0.141                 | -0.92  | 1.05E-07 | 0.141                         | -0.655 | 3.44E-06 |
| 9                      | <i>BNC2</i>   | rs717267        | 16408826  | G/A | 0.399                 | -0.637 | 1.67E-07 | 0.399                         | -0.463 | 3.08E-06 |
| 1                      | <i>TGFBR3</i> | rs4658267       | 92240753  | C/A | 0.319                 | 0.679  | 1.87E-07 | 0.319                         | 0.448  | 2.31E-05 |
| 9                      | <i>SEC61B</i> | rs182704        | 102068912 | T/C | 0.344                 | 0.658  | 2.07E-07 | 0.345                         | 0.564  | 4.35E-08 |
| 6                      | <i>SFTA2</i>  | rs2532929       | 30897774  | A/G | 0.397                 | -0.622 | 4.19E-07 | 0.397                         | -0.386 | 1.12E-04 |
| X                      | <b>RAP2C</b>  | rs200879388     | 131300571 | D/I | 0.649                 | 0.662  | 4.52E-07 | 0.650                         | 0.433  | 4.89E-05 |
| 10                     | <i>MPP7</i>   | rs2253165       | 28337017  | A/G | 0.44                  | -0.594 | 9.33E-07 | 0.440                         | -0.418 | 2.22E-05 |
| <i>Preterm birth</i>   |               |                 |           |     |                       |        |          |                               |        |          |
| 5                      | <b>EBF1</b>   | rs2963463       | 157895049 | C/T | 0.272                 | 1.23   | 3.15E-13 | 0.272                         | 1.311  | 3.39E-14 |
| 3                      | <b>EEFSEC</b> | rs201450565     | 128058610 | D/I | 0.233                 | 0.81   | 1.43E-10 | 0.233                         | 0.831  | 7.10E-06 |
| 17                     | <i>TEKT3</i>  | rs7217780       | 15191024  | T/C | 0.336                 | 1.15   | 3.52E-07 | 0.336                         | 1.157  | 2.21E-05 |
| 19                     | <i>TGFB1</i>  | rs11466328      | 41851042  | G/A | 0.0288                | 0.567  | 5.31E-07 | 0.0283                        | 0.518  | 5.96E-06 |
| X                      | <b>AGTR2</b>  | rs201386833     | 115164281 | D/I | 0.41                  | 1.15   | 8.45E-07 | 0.408                         | 1.175  | 3.59E-06 |

<sup>@</sup> Original (as reported in the manuscript): Women with a medical indication were excluded, but those who did not specify a medical indication were retained.

<sup>#</sup> Spontaneous only: a subset of the original (full) data set, only including those who specifically checked “spontaneous birth”.

**Table S7. Discovery and replication of GWA loci associated with gestational age**

| No                       | Chr       | From      | To        | Genes                                            | SNP Information           |                  |     |       | Discovery Phase |               |                 |          |                | Replication Phase |               |                 |              | Genotypic       |               |                 | Joint analysis  |            |
|--------------------------|-----------|-----------|-----------|--------------------------------------------------|---------------------------|------------------|-----|-------|-----------------|---------------|-----------------|----------|----------------|-------------------|---------------|-----------------|--------------|-----------------|---------------|-----------------|-----------------|------------|
|                          |           |           |           |                                                  | rs                        | pos              | A/B | AA    | Freq            | Eff           | P-value         | Rank     | r <sup>2</sup> | Freq              | Eff           | P-value         | P.hetero     | P.add           | P.dom         | P.geno          | P-value         | Directions |
| 1                        | chr5      | 157408195 | 158308569 | <i>EBF1</i>                                      | <b>rs2963463</b>          | <b>157895049</b> | C/T | T     | <b>0.272</b>    | <b>-1.29</b>  | <b>1.03E-21</b> | <b>1</b> | -              | <b>0.264</b>      | <b>-1.11</b>  | <b>0.00172</b>  | <b>0.105</b> | <b>0.00308</b>  | <b>0.36</b>   | <b>0.00635</b>  | <b>7.66E-24</b> | <b>+++</b> |
|                          |           |           |           |                                                  | rs201770678               | 157894745        | D/I | I     | 0.267           | -1.29         | 1.71E-21        | 2        | 0.865          | 0.275             | -1.11         | 0.00184         | 0.117        | 0.245           | 0.314         | 0.477           | 1.37E-23        | ++         |
|                          |           |           |           |                                                  | rs12520982                | 157894747        | T/C | T     | 0.266           | -1.29         | 2.47E-21        | 3        | 0.848          | 0.281             | -1.19         | 0.000844        | 0.151        | 0.0012          | 0.15          | 0.0043          | 8.72E-24        | +++        |
|                          |           |           |           |                                                  | rs7729301 <sup>bwt</sup>  | 157886953        | A/G | G     | 0.265           | -1.28         | 9.39E-21        | 13       | 0.915          | 0.256             | -1.02         | 0.00426         | 0.0959       | 0.00802         | 0.396         | 0.0172          | 1.85E-22        | ++         |
|                          |           |           |           |                                                  | rs2946171                 | 157921940        | T/G | T     | 0.219           | -1.24         | 1.11E-17        | 24       | 0.708          | 0.206             | -1.46         | 0.000138        | 0.0722       | 0.0156          | 0.822         | 0.000891        | 8.09E-21        | ++         |
| 2                        | chr3      | 127460474 | 128372820 | <i>EEFSEC</i><br><i>RUVBL1</i><br><i>SEC61A1</i> | <b>rs2955117</b>          | <b>127881613</b> | G/A | A     | <b>0.286</b>    | <b>0.911</b>  | <b>7.24E-12</b> | <b>1</b> |                | <b>0.279</b>      | <b>1.33</b>   | <b>0.00016</b>  | <b>0.895</b> | <b>1.23E-05</b> | <b>0.0411</b> | <b>5.26E-05</b> | <b>9.49E-15</b> | <b>+++</b> |
|                          |           |           |           |                                                  | rs2999049                 | 127878817        | T/C | C     | 0.273           | 0.914         | 1.07E-11        | 2        | 0.955          | 0.27              | 1.42          | 5.51E-05        | 0.917        | 1.02E-05        | 0.0459        | 3.68E-05        | 6.68E-15        | +++        |
|                          |           |           |           |                                                  | rs2461794                 | 127870060        | G/A | N     | 0.273           | 0.911         | 1.21E-11        | 3        | 0.861          | 0.276             | 1.4           | 7.71E-05        | 0.963        | 2.56E-05        | 0.103         | 6.75E-05        | 9.94E-15        | +++        |
|                          |           |           |           |                                                  | rs200745338               | 127869457        | D/I | -     | 0.237           | 0.986         | 1.50E-11        | 8        | 0.724          | 0.232             | 1.91          | 7.62E-07        | 0.787        | 0.0236          | 0.236         | 0.0681          | 7.51E-16        | +++        |
|                          |           |           |           |                                                  | rs10934853 <sup>GWA</sup> | 128038373        | C/A | A     | 0.274           | 0.894         | 2.43E-11        | 17       | 0.785          | 0.273             | 1.37          | 9.90E-05        | 0.837        | 2.05E-05        | 0.0583        | 7.22E-05        | 2.37E-14        | +++        |
|                          |           |           |           |                                                  | rs2999052 <sup>GWA</sup>  | 127892037        | T/C | C     | 0.27            | 0.889         | 4.02E-11        | 24       | 0.949          | 0.269             | 1.44          | 4.36E-05        | 0.848        | 9.67E-06        | 0.0457        | 3.46E-05        | 2.39E-14        | +++        |
|                          |           |           |           |                                                  | rs2687729 <sup>GWA</sup>  | 127895226        | A/G | G     | 0.27            | 0.889         | 4.04E-11        | 25       | 0.949          | 0.269             | 1.44          | 4.35E-05        | 0.849        | 9.74E-06        | 0.0452        | 3.51E-05        | 2.40E-14        | +++        |
| rs2811474 <sup>GWA</sup> | 127892851 | G/C       | G         | 0.157                                            | 0.858                     | 2.42E-07         | 234 | 0.424 | 0.16            | 1.45          | 0.000752        | 0.381    | 0.0153         | 0.597             | 0.00223       | 1.64E-09        | +++          |                 |               |                 |                 |            |
| 3                        | chrX      | 114879442 | 115442159 | <i>AGTR2</i><br><i>PLS3</i>                      | <b>rs201226733</b>        | <b>115164770</b> | I/D | D     | <b>0.422</b>    | <b>-0.82</b>  | <b>5.71E-11</b> | <b>1</b> |                | <b>0.42</b>       | <b>-1.67</b>  | <b>9.18E-08</b> | <b>0.499</b> | <b>6.13E-05</b> | <b>0.208</b>  | <b>0.000272</b> | <b>7.16E-16</b> | <b>+++</b> |
|                          |           |           |           |                                                  | rs201386833               | 115164281        | D/I | I     | 0.41            | -0.837        | 6.52E-11        | 2        | 0.925          | 0.411             | -1.7          | 9.24E-08        | 0.495        | 6.82E-05        | 0.192         | 0.00029         | 8.01E-16        | +++        |
|                          |           |           |           |                                                  | rs35401609                | 115164771        | I/D | D     | 0.421           | -0.816        | 6.69E-11        | 3        | 1              | 0.42              | -1.67         | 9.07E-08        | 0.5          | 6.13E-05        | 0.208         | 0.000272        | 8.45E-16        | +++        |
|                          |           |           |           |                                                  | rs5950491                 | 115129714        | C/A | C     | 0.423           | -0.826        | 6.84E-11        | 5        | 0.917          | 0.425             | -1.75         | 4.74E-08        | 0.479        | 5.76E-08        | 0.27          | 4.08E-07        | 6.62E-16        | +++        |
| 4                        | chr1      | 22097396  | 22843805  | <i>WNT4</i><br><i>CDC42</i><br><i>CELA3A</i>     | <b>rs56318008</b>         | <b>22470407</b>  | C/T | C     | <b>0.139</b>    | <b>1.05</b>   | <b>1.15E-09</b> | <b>1</b> |                | <b>0.153</b>      | <b>2.27</b>   | <b>1.79E-07</b> | <b>0.162</b> | <b>0.0403</b>   | <b>0.334</b>  | <b>1.54E-06</b> | <b>3.35E-14</b> | <b>+++</b> |
|                          |           |           |           |                                                  | rs55938609                | 22470451         | G/C | G     | 0.139           | 1.05          | 1.15E-09        | 2        | 1              | 0.153             | 2.27          | 1.79E-07        | 0.162        | 0.0403          | 0.334         | 1.54E-06        | 3.32E-14        | +++        |
|                          |           |           |           |                                                  | rs3820282 <sup>GWA</sup>  | 22468215         | C/T | C     | 0.144           | 1             | 4.25E-09        | 3        | 0.935          | 0.155             | 2.36          | 4.90E-08        | 0.171        | 0.0111          | 0.4           | 1.96E-07        | 8.15E-14        | +++        |
|                          |           |           |           |                                                  | rs12037376                | 22462111         | G/A | g     | 0.145           | 1             | 4.45E-09        | 4        | 0.914          | 0.157             | 2.41          | 2.10E-08        | 0.136        | 0.00716         | 0.464         | 1.55E-07        | 5.55E-14        | +++        |
|                          |           |           |           |                                                  | rs3765350 <sup>GWA</sup>  | 22447316         | A/G | A     | 0.203           | 0.833         | 2.14E-08        | 8        | 0.633          | 0.21              | 1.88          | 6.41E-07        | 0.194        | 0.00316         | 0.414         | 6.65E-06        | 1.96E-12        | +++        |
|                          |           |           |           |                                                  | rs2235529 <sup>GWA</sup>  | 22450487         | C/T | C     | 0.143           | 0.95          | 2.46E-08        | 10       | 0.896          | 0.159             | 2.31          | 6.32E-08        | 0.198        | 0.00505         | 0.715         | 1.14E-06        | 6.69E-13        | +++        |
| 5                        | chr3      | 122668928 | 123372314 | <i>ADCY5</i><br><i>SEC22A</i><br><i>HACD2</i>    | <b>rs4383453</b>          | <b>123068359</b> | G/A | G     | <b>0.2</b>      | <b>-0.808</b> | <b>9.62E-08</b> | <b>1</b> |                | <b>0.197</b>      | <b>-0.587</b> | <b>0.145</b>    | <b>0.532</b> | <b>0.821</b>    | <b>0.527</b>  | <b>0.493</b>    | <b>3.69E-08</b> | <b>++</b>  |
|                          |           |           |           |                                                  | rs78519666                | 123065511        | T/A | t     | 0.103           | -1.14         | 2.64E-07        | 2        | 0.475          | 0.0986            | -0.0876       | 0.881           | 0.281        | 0.0613          | 0.0906        | 0.174           | 1.14E-06        | --         |
|                          |           |           |           |                                                  | rs6794803                 | 123085337        | T/C | T     | 0.463           | -0.6          | 5.52E-07        | 3        | 0.321          | 0.483             | -1.12         | 0.000346        | 0.973        | 0.00046         | 0.406         | 0.00206         | 2.55E-09        | +++        |
|                          |           |           |           |                                                  | rs9861425                 | 123072883        | A/C | C     | 0.453           | -0.598        | 6.12E-07        | 5        | 0.344          | 0.47              | -1.38         | 9.52E-06        | 0.942        | 6.29E-06        | 0.0582        | 1.93E-05        | 4.24E-10        | +++        |
| 6                        | chr2      | 73950833  | 74611290  | <i>BOLA3</i><br><i>MOB1A</i>                     | <b>rs4853012</b>          | <b>74361290</b>  | G/A | G     | <b>0.141</b>    | <b>-0.92</b>  | <b>1.05E-07</b> | <b>1</b> |                | <b>0.145</b>      | <b>-0.355</b> | <b>0.424</b>    | <b>0.237</b> | <b>0.232</b>    | <b>0.411</b>  | <b>0.473</b>    | <b>1.56E-07</b> | <b>++</b>  |
|                          |           |           |           |                                                  | rs13390332                | 74207357         | G/A | G     | 0.0579          | -1.33         | 3.18E-07        | 2        | 0.129          | 0.0572            | -2.05         | 0.00271         | 0.462        | 0.455           | 0.97          | 0.0297          | 5.09E-09        | --         |

|    |       |           |           |                                              |                           |                         |                   |                 |                     |                      |                        |                 |                 |                     |                       |                        |                     |                     |                     |                     |                        |     |
|----|-------|-----------|-----------|----------------------------------------------|---------------------------|-------------------------|-------------------|-----------------|---------------------|----------------------|------------------------|-----------------|-----------------|---------------------|-----------------------|------------------------|---------------------|---------------------|---------------------|---------------------|------------------------|-----|
|    |       |           |           | <i>TET3</i>                                  | rs6721042                 | 74217283                | G/T               | G               | 0.0587              | -1.31                | 4.30E-07               | 3               | 0.129           | 0.0567              | -2.06                 | 0.00261                | 0.426               | 0.32                | 0.836               | 0.0278              | 6.90E-09               | --- |
|    |       |           |           |                                              | <i>rs17009553</i>         | <i>74220035</i>         | <i>G/A</i>        | <i>G</i>        | <i>0.0567</i>       | <i>-1.28</i>         | <i>1.14E-06</i>        | <i>6</i>        | <i>0.129</i>    | <i>0.0565</i>       | <i>-2.11</i>          | <i>0.00204</i>         | <i>0.43</i>         | <i>0.319</i>        | <i>0.88</i>         | <i>0.0183</i>       | <i>1.62E-08</i>        | --- |
| 7  | chr9  | 16149953  | 16719213  | <i>BNC2</i><br><i>C9orf92</i>                | <b><u>rs717267</u></b>    | <b><u>16408826</u></b>  | <b><u>G/A</u></b> | <b><u>G</u></b> | <b><u>0.399</u></b> | <b><u>-0.637</u></b> | <b><u>1.67E-07</u></b> | <b><u>1</u></b> | <b><u>-</u></b> | <b><u>0.423</u></b> | <b><u>-0.12</u></b>   | <b><u>0.703</u></b>    | <b><u>0.498</u></b> | <b><u>0.853</u></b> | <b><u>0.52</u></b>  | <b><u>0.763</u></b> | <b><u>5.25E-07</u></b> | +++ |
|    |       |           |           |                                              | rs6475050                 | 16407780                | G/A               | A               | 0.399               | -0.63                | 2.44E-07               | 2               | 0.978           | 0.423               | -0.096                | 0.76                   | 0.483               | 0.947               | 0.46                | 0.737               | 8.46E-07               | +++ |
|    |       |           |           |                                              | rs10810563                | 16399953                | G/T               | T               | 0.408               | -0.643               | 2.72E-07               | 3               | 0.882           | 0.425               | -0.128                | 0.689                  | 0.669               | 0.957               | 0.173               | 0.381               | 8.02E-07               | +++ |
|    |       |           |           |                                              | rs9298764                 | 16431230                | A/G               | G               | 0.456               | -0.55                | 5.21E-06               | 19              | 0.807           | 0.474               | -0.443                | 0.159                  | 0.212               | 0.201               | 0.875               | 0.408               | 1.96E-06               | +++ |
| 8  | chr1  | 91984421  | 92490753  | <i>TGFB3</i><br><i>BRDT</i><br><i>CDC7</i>   | <b><u>rs4658267</u></b>   | <b><u>92240753</u></b>  | <b><u>C/A</u></b> | <b><u>C</u></b> | <b><u>0.319</u></b> | <b><u>0.679</u></b>  | <b><u>1.87E-07</u></b> | <b><u>1</u></b> | <b><u>-</u></b> | <b><u>0.319</u></b> | <b><u>0.0562</u></b>  | <b><u>0.867</u></b>    | <b><u>0.706</u></b> | <b><u>0.993</u></b> | <b><u>0.603</u></b> | <b><u>0.84</u></b>  | <b><u>8.76E-07</u></b> | +++ |
|    |       |           |           |                                              | rs4658265                 | 92240685                | C/T               | T               | 0.312               | 0.662                | 4.84E-07               | 2               | 0.914           | 0.311               | 0.125                 | 0.71                   | 0.94                | 0.974               | 0.454               | 0.696               | 1.43E-06               | --- |
|    |       |           |           |                                              | rs284201                  | 92240238                | C/T               | C               | 0.283               | 0.59                 | 1.15E-05               | 3               | 0.802           | 0.269               | -0.0151               | 0.966                  | 0.998               | 0.535               | 0.32                | 0.61                | 4.36E-05               | --- |
| 9  | chr9  | 101806013 | 102324119 | <i>SEC61B</i><br><i>ALG2</i><br><i>TGFB1</i> | <b><u>rs182704</u></b>    | <b><u>102068912</u></b> | <b><u>T/C</u></b> | <b><u>C</u></b> | <b><u>0.344</u></b> | <b><u>0.658</u></b>  | <b><u>2.07E-07</u></b> | <b><u>1</u></b> | <b><u>-</u></b> | <b><u>0.397</u></b> | <b><u>0.145</u></b>   | <b><u>0.668</u></b>    | <b><u>0.495</u></b> | <b><u>0.525</u></b> | <b><u>0.266</u></b> | <b><u>0.524</u></b> | <b><u>5.37E-07</u></b> | --- |
|    |       |           |           |                                              | rs1622127                 | 102063150               | A/C               | C               | 0.336               | 0.644                | 3.24E-07               | 2               | 0.764           | 0.351               | 0.0926                | 0.777                  | 0.416               | 0.315               | 0.0935              | 0.236               | 1.11E-06               | --- |
|    |       |           |           |                                              | rs162621                  | 102064575               | T/C               | C               | 0.336               | 0.643                | 3.53E-07               | 3               | 0.764           | 0.35                | 0.106                 | 0.747                  | 0.404               | 0.315               | 0.106               | 0.259               | 1.13E-06               | --- |
| 10 | chr6  | 30552017  | 31173629  | <i>SFTA2</i><br><i>VARS2</i><br><i>DPCR1</i> | <b><u>rs2532929</u></b>   | <b><u>30897774</u></b>  | <b><u>A/G</u></b> | <b><u>G</u></b> | <b><u>0.397</u></b> | <b><u>-0.622</u></b> | <b><u>4.19E-07</u></b> | <b><u>1</u></b> | <b><u>-</u></b> | <b><u>0.402</u></b> | <b><u>-0.0486</u></b> | <b><u>0.879</u></b>    | <b><u>0.139</u></b> | <b><u>0.772</u></b> | <b><u>0.98</u></b>  | <b><u>0.957</u></b> | <b><u>1.80E-06</u></b> | +++ |
|    |       |           |           |                                              | rs2532927                 | 30898434                | A/G               | G               | 0.367               | -0.557               | 7.96E-06               | 2               | 0.902           | 0.377               | -0.0603               | 0.85                   | 0.413               | 0.773               | 0.827               | 0.952               | 2.34E-05               | +++ |
|    |       |           |           |                                              | rs2532926                 | 30898441                | A/G               | G               | 0.363               | -0.556               | 9.02E-06               | 3               | 0.866           | 0.374               | -0.0653               | 0.839                  | 0.343               | 0.697               | 0.712               | 0.899               | 2.54E-05               | +++ |
| 11 | chrX  | 130986215 | 131826714 | <i>RAP2C</i><br><i>FRMD7</i><br><i>STK26</i> | <b><u>rs200879388</u></b> | <b><u>131300571</u></b> | <b><u>I/D</u></b> | <b><u>-</u></b> | <b><u>0.351</u></b> | <b><u>-0.662</u></b> | <b><u>4.52E-07</u></b> | <b><u>1</u></b> | <b><u>-</u></b> | <b><u>0.364</u></b> | <b><u>-1.1</u></b>    | <b><u>0.000924</u></b> | <b><u>0.536</u></b> | <b><u>0.343</u></b> | <b><u>0.452</u></b> | <b><u>0.58</u></b>  | <b><u>3.42E-09</u></b> | +++ |
|    |       |           |           |                                              | rs2999094                 | 131268226               | C/T               | T               | 0.3                 | -0.596               | 5.59E-06               | 2               | 0.407           | 0.318               | -1.27                 | 0.00012                | 0.915               | 8.75E-05            | 0.182               | 0.0004              | 1.72E-08               | +++ |
|    |       |           |           |                                              | rs2747027                 | 131268092               | T/G               | T               | 0.3                 | -0.596               | 5.60E-06               | 3               | 0.407           | 0.318               | -1.27                 | 0.00012                | 0.916               | 8.75E-05            | 0.182               | 0.0004              | 1.72E-08               | +++ |
| 12 | chr10 | 28061621  | 28598815  | <i>MPP7</i><br><i>ARMC4</i>                  | <b><u>rs2253165</u></b>   | <b><u>28337017</u></b>  | <b><u>A/G</u></b> | <b><u>G</u></b> | <b><u>0.44</u></b>  | <b><u>-0.594</u></b> | <b><u>9.33E-07</u></b> | <b><u>1</u></b> | <b><u>-</u></b> | <b><u>0.429</u></b> | <b><u>0.454</u></b>   | <b><u>0.154</u></b>    | <b><u>0.456</u></b> | <b><u>0.258</u></b> | <b><u>0.855</u></b> | <b><u>0.527</u></b> | <b><u>4.50E-05</u></b> | --- |
|    |       |           |           |                                              | rs2245244                 | 28316456                | T/C               | T               | 0.438               | -0.561               | 3.69E-06               | 2               | 0.86            | 0.428               | 0.507                 | 0.105                  | 0.402               | 0.0948              | 0.743               | 0.248               | 0.00019                | --- |
|    |       |           |           |                                              | rs2253011                 | 28335832                | C/T               | C               | 0.434               | -0.551               | 5.70E-06               | 3               | 0.885           | 0.423               | 0.486                 | 0.125                  | 0.369               | 0.101               | 0.532               | 0.243               | 0.000226               | --- |

For each region, we showed the top 3 (rank=1,2,3) SNPs based on their discovery phase  $P$  values. We also showed the SNP with the smallest replication  $P$ -value (*italic*), SNP with the smallest joint-analysis  $P$ -value (underlined) as well as previously reported GWA SNPs (marker by <sup>GWA</sup>) and birth weight associated SNPs (marker by <sup>bwt</sup>).  $P$ .hetero is  $P$  value of heterogeneity test across replication studies.  $P$ .add,  $P$ .dom and  $P$ .geno are  $P$  values for additive, dominant and genotypic effects based on genotype-based association test (d.f.=2). SNP positions were based on GRCh37/hg19. Alleles were given based on positive strand of reference genome. Allele B is used as the reference allele for frequency and effect.

**Table S8. Discovery and replication of GWA loci associated with preterm birth**

| No | Chr   | From      | To        | Genes                                               | SNP Information           |                  |            |          | Discovery Phase |              |                 |           |                | Replication Phase |              |                 |               | Genotypic       |              |                 | Joint analysis  |            |
|----|-------|-----------|-----------|-----------------------------------------------------|---------------------------|------------------|------------|----------|-----------------|--------------|-----------------|-----------|----------------|-------------------|--------------|-----------------|---------------|-----------------|--------------|-----------------|-----------------|------------|
|    |       |           |           |                                                     | rs                        | pos              | A/B        | AA       | Freq            | Eff          | P-value         | Rank      | r <sup>2</sup> | Freq              | Eff          | P-value         | P.hetero      | P.add           | P.dom        | P geno          | P-value         | Directions |
| 1  | chr5  | 157374012 | 158280813 | <i>EBF1</i>                                         | <b>rs2963463</b>          | <b>157895049</b> | C/T        | T        | <b>0.272</b>    | <b>1.23</b>  | <b>3.15E-13</b> | <b>1</b>  |                | <b>0.265</b>      | <b>1.13</b>  | <b>0.00153</b>  | <b>0.103</b>  | <b>0.0143</b>   | <b>0.754</b> | <b>0.0503</b>   | <b>4.53E-15</b> | <b>+++</b> |
|    |       |           |           |                                                     | rs2964484                 | 157897437        | A/G        | A        | 0.266           | 1.23         | 4.22E-13        | 2         | 0.934          | 0.265             | 1.14         | 0.000751        | 0.128         | 0.00252         | 0.626        | 0.00273         | 2.26E-15        | +++        |
|    |       |           |           |                                                     | rs2419911                 | 157898103        | G/T        |          | 0.266           | 1.23         | 4.22E-13        | 3         | 0.947          | 0.262             | 1.13         | 0.00133         | 0.124         | 0.00373         | 0.643        | 0.00396         | 5.72E-15        | ++         |
|    |       |           |           |                                                     | <u>rs12520982</u>         | <u>157894747</u> | <u>T/C</u> | <u>T</u> | <u>0.266</u>    | <u>1.23</u>  | <u>5.52E-13</u> | <u>6</u>  | <u>0.848</u>   | <u>0.281</u>      | <u>1.15</u>  | <u>0.000562</u> | <u>0.0999</u> | <u>0.00323</u>  | <u>0.56</u>  | <u>0.00481</u>  | <u>1.98E-15</u> | <b>+++</b> |
|    |       |           |           |                                                     | rs7729301 <sup>bwt</sup>  | 157886953        | A/G        | G        | 0.265           | 1.21         | 1.93E-11        | 14        | 0.915          | 0.257             | 1.12         | 0.00545         | 0.102         | 0.0226          | 0.771        | 0.0174          | 1.01E-12        | ++         |
|    |       |           |           |                                                     | <i>rs2946169</i>          | <i>157918959</i> | <i>C/T</i> | <i>T</i> | <i>0.217</i>    | <i>1.22</i>  | <i>1.09E-10</i> | <i>19</i> | <i>0.684</i>   | <i>0.207</i>      | <i>1.16</i>  | <i>0.000551</i> | <i>0.0481</i> | <i>0.193</i>    | <i>0.183</i> | <i>0.00179</i>  | <i>2.20E-13</i> | ++         |
| 2  | chr3  | 127460474 | 128373786 | <i>EEFSEC</i><br><i>DNAJB8</i><br><i>GATA2</i>      | <b>rs201450565</b>        | <b>128058610</b> | D/I        |          | <b>0.233</b>    | <b>0.81</b>  | <b>1.43E-10</b> | <b>1</b>  |                | <b>0.135</b>      | <b>0.824</b> | <b>0.00173</b>  | <b>0.603</b>  | <b>0.0603</b>   | <b>0.279</b> | <b>0.0353</b>   | <b>1.91E-12</b> | <b>+++</b> |
|    |       |           |           |                                                     | rs3849531                 | 128058617        | A/T        | T        | 0.277           | 0.826        | 1.60E-10        | 2         | 0.414          | 0.267             | 0.852        | 9.95E-05        | 0.808         | 8.01E-05        | 0.0595       | 0.000182        | 1.48E-13        | +++        |
|    |       |           |           |                                                     | rs4857841                 | 128046643        | G/A        | A        | 0.274           | 0.828        | 2.04E-10        | 3         | 0.383          | 0.272             | 0.846        | 2.79E-05        | 0.632         | 1.22E-05        | 0.0425       | 2.72E-05        | 5.30E-14        | +++        |
|    |       |           |           |                                                     | rs10934853 <sup>GWA</sup> | 128038373        | C/A        | A        | 0.274           | 0.828        | 2.04E-10        | 4         | 0.383          | 0.272             | 0.847        | 2.88E-05        | 0.632         | 1.31E-05        | 0.0441       | 2.81E-05        | 5.83E-14        | +++        |
|    |       |           |           |                                                     | rs2687729 <sup>GWA</sup>  | 127895226        | A/G        | G        | 0.27            | 0.835        | 1.48E-09        | 61        | 0.28           | 0.269             | 0.836        | 7.84E-06        | 0.606         | 5.97E-06        | 0.0368       | 1.14E-05        | 9.10E-14        | +++        |
|    |       |           |           |                                                     | rs2999052 <sup>GWA</sup>  | 127892037        | T/C        | C        | 0.27            | 0.835        | 1.49E-09        | 63        | 0.28           | 0.269             | 0.836        | 7.86E-06        | 0.606         | 5.82E-06        | 0.0384       | 1.07E-05        | 9.64E-14        | +++        |
|    |       |           |           |                                                     | <u>rs200745338</u>        | <u>127869457</u> | <u>D/I</u> | <u>-</u> | <u>0.237</u>    | <u>0.829</u> | <u>9.01E-09</u> | <u>95</u> | <u>0.239</u>   | <u>0.232</u>      | <u>0.797</u> | <u>3.52E-07</u> | <u>0.825</u>  | <u>0.00618</u>  | <u>0.406</u> | <u>0.00359</u>  | <u>3.27E-14</u> | <b>+++</b> |
|    |       |           |           |                                                     | rs2811474 <sup>GWA</sup>  | 127892851        | G/C        | G        | 0.157           | 0.84         | 2.70E-06        | 236       | 0.078          | 0.159             | 0.83         | 0.000165        | 0.377         | 0.00769         | 0.323        | 0.00101         | 2.80E-09        | +++        |
| 3  | chr17 | 14923221  | 15498449  | <i>TEKT3</i><br><i>PMP22</i><br><i>TVP23C-CDRT4</i> | <b>rs7217780</b>          | <b>15191024</b>  | T/C        | C        | <b>0.336</b>    | <b>1.15</b>  | <b>3.52E-07</b> | <b>1</b>  | <b>-</b>       | <b>0.341</b>      | <b>1.09</b>  | <b>0.0252</b>   | <b>0.488</b>  | <b>0.103</b>    | <b>0.55</b>  | <b>0.106</b>    | <b>4.85E-08</b> | <b>+++</b> |
|    |       |           |           |                                                     | rs66847224                | 15195812         | D/I        |          | 0.344           | 1.15         | 3.98E-07        | 2         | 0.746          | 0.343             | 1.07         | 0.0647          | 0.208         | 0.203           | 0.791        | 0.211           | 2.10E-07        | +++        |
|    |       |           |           |                                                     | rs2024157                 | 15196537         | T/C        | C        | 0.343           | 1.15         | 5.58E-07        | 3         | 0.752          | 0.343             | 1.07         | 0.0649          | 0.199         | 0.135           | 0.818        | 0.305           | 2.64E-07        | +++        |
|    |       |           |           |                                                     | rs1380181 <sup>GWA</sup>  | 15193056         | G/A        | G        | 0.314           | 1.14         | 3.57E-06        | 10        | 0.908          | 0.327             | 1.08         | 0.0442          | 0.648         | 0.0927          | 0.986        | 0.144           | 7.68E-07        | +++        |
|    |       |           |           |                                                     | <i>rs179521</i>           | <i>15173221</i>  | <i>C/A</i> | <i>A</i> | <i>0.359</i>    | <i>1.13</i>  | <i>3.84E-06</i> | <i>11</i> | <i>0.805</i>   | <i>0.357</i>      | <i>1.1</i>   | <i>0.0116</i>   | <i>0.407</i>  | <i>0.0114</i>   | <i>0.798</i> | <i>0.0289</i>   | <i>1.61E-07</i> | +++        |
| 4  | chr19 | 41601042  | 42101042  | <i>TGFB1</i><br><i>B9D2</i><br><i>TMEM91</i>        | <b>rs11466328</b>         | <b>41851042</b>  | G/A        | G        | <b>0.0288</b>   | <b>0.567</b> | <b>5.31E-07</b> | <b>1</b>  | <b>-</b>       | <b>0.0311</b>     | <b>0.711</b> | <b>0.0377</b>   | <b>0.685</b>  | <b>NA</b>       | <b>NA</b>    | <b>NA</b>       | <b>5.47E-07</b> | <b>+++</b> |
|    |       |           |           |                                                     | rs139581508               | 41888023         | C/T        | c        | 0.0146          | 1.31         | 0.00857         | 2         | 0.001          | 0.0208            | 0.92         | 0.532           | 0.361         | NA              | NA           | NA              | 0.0703          | +-         |
|    |       |           |           |                                                     | rs8108632                 | 41854534         | A/T        | t        | 0.458           | 1.07         | 0.011           | 3         | 0.012          | 0.447             | 0.924        | 0.0355          | 0.835         | 0.00744         | 0.314        | 0.0241          | 0.4             | ---        |
| 5  | chrX  | 114879714 | 115434372 | <i>AGTR2</i><br><i>PLS3</i>                         | <b>rs201386833</b>        | <b>115164281</b> | D/I        |          | <b>0.41</b>     | <b>1.15</b>  | <b>8.45E-07</b> | <b>1</b>  |                | <b>0.41</b>       | <b>1.18</b>  | <b>2.31E-06</b> | <b>0.298</b>  | <b>3.61E-05</b> | <b>0.497</b> | <b>0.000195</b> | <b>1.03E-11</b> | <b>+++</b> |
|    |       |           |           |                                                     | rs5991030                 | 115129904        | T/C        | T        | 0.417           | 1.15         | 8.59E-07        | 2         | 0.851          | 0.422             | 1.18         | 1.72E-06        | 0.238         | 1.18E-06        | 0.271        | 5.67E-06        | 8.68E-12        | +++        |
|    |       |           |           |                                                     | rs62602480                | 115137917        | C/T        | C        | 0.419           | 1.14         | 8.77E-07        | 3         | 0.871          | 0.422             | 1.18         | 1.82E-06        | 0.249         | 1.32E-06        | 0.278        | 6.59E-06        | 9.27E-12        | +++        |
|    |       |           |           |                                                     | <i>rs5950506</i>          | <i>115175748</i> | <i>G/A</i> | <i>G</i> | <i>0.42</i>     | <i>1.14</i>  | <i>1.22E-06</i> | <i>10</i> | <i>0.918</i>   | <i>0.418</i>      | <i>1.18</i>  | <i>1.55E-06</i> | <i>0.304</i>  | <i>9.02E-07</i> | <i>0.324</i> | <i>4.72E-06</i> | <i>1.12E-11</i> | +++        |

Notation: same as Table S6.



**Table S9. Associations with known GWA SNPs**

| Locus         | Chr | SNP         | pos       | A/B | freq | Trait                     | Effect              | P        | PMID     |
|---------------|-----|-------------|-----------|-----|------|---------------------------|---------------------|----------|----------|
| <i>EBF1</i>   | 5   | rs7729301#  | 157886953 | A/G | 0.28 | birth weight              | -0.024              | 1.00E-8  | 27680694 |
| <i>EEFSEC</i> | 3   | rs10934853  | 128038373 | C/A | 0.28 | Prostate cancer           | OR:1.12             | 3.00E-10 | 19767754 |
|               |     | rs2999052   | 127892037 | T/C | 0.26 | Hypospadias               | reduced OR:1.55     | 1.00E-26 | 25108383 |
|               |     | rs2687729   | 127895226 | A/G | 0.27 | Menarche (age at onset)   | 0.04 unit increase  | 1.00E-10 | 25231870 |
|               |     |             |           |     | 0.27 | Menarche (age at onset)   | 2.3 week increase   | 1.00E-07 | 21102462 |
|               |     | rs2811474   | 127892851 | G/C | NR   | Schizophrenia             | OR:1.064            | 9.00E-06 | 26198764 |
| <i>WNT4</i>   | 1   | rs3820282   | 22468215  | C/T | NR   | Epithelial ovarian cancer | OR:1.11             | 2.00E-08 | 25581431 |
|               |     | rs3765350   | 22447316  | A/G | 0.22 | Bone mineral density      | 0.107 unit decrease | 7.00E-10 | 24945404 |
|               |     | rs2235529   | 22450487  | C/T | 0.15 | Bone mineral density      | 0.117 unit decrease | 1.00E-08 | 24945404 |
|               |     |             |           |     | 0.15 | Endometriosis             | OR:1.3              | 3.00E-09 | 23472165 |
|               |     | rs10917151* | 22422721  | G/A | 0.15 | Endometriosis             | OR: 1.28            | 7.00E-09 | 23472165 |
|               |     | rs4654783*  | 22439520  | C/T |      |                           |                     |          |          |
| <i>TEKT3</i>  | 17  | rs1380181   | 15193056  | G/A | 0.2  | QT interval               | 1.97 unit decrease  | 3.00E-07 | 23166209 |

This table shows a list of SNPs which were significantly associated with gestational age or preterm birth and were also previously reported GWA SNPs (GWAS catalog, r2017-01-09). Effect and *P* are reported effect size and *P* value. Allele B was used as the reference allele for allele frequency and effect annotation. Except for rs77293021 (*EBF1* locus) and rs1380181 (*TEKT3* locus), the reference alleles (allele B) were associated with increased gestational age and reduced risk of preterm birth.

# This association was recently reported by Horikoshi et al. (*Nature* 2016, 538:248-52) and was not yet available in GWA catalog.

\* rs10917151 and rs4654783 were listed in GWAS catalog not as individual records but as a 3-SNP haplotype together with rs2235529 and the frequency (0.15) is the reported haplotype frequency.

**Table S10. eQTLs in GWA loci associated with gestational length**

| region# | Expression       |             | eQTL SNP®   |           |        |           |           |           | GWA SNPs   |           |       |           |           |
|---------|------------------|-------------|-------------|-----------|--------|-----------|-----------|-----------|------------|-----------|-------|-----------|-----------|
|         | Gene             | Tissue      | rs          | pos       | beta   | $P_{QTL}$ | $P_{Dis}$ | $P_{Rep}$ | rs         | pos       | $r^2$ | $P_{Dis}$ | $P_{Rep}$ |
| 1       | <i>THG1L</i>     | Esophagus   | rs1023666   | 157968677 | -0.2   | 1.65E-05  | 4.41E-07  | 0.0684    | rs3934712  | 157928196 | 0.83  | 9.91E-08  | 0.0434    |
| 2       | <i>SEC61A1</i>   | fibroblasts | rs6439111   | 127784612 | -0.186 | 2.73E-13  | 8.99E-07  | 0.024     | rs11717102 | 127727752 | 0.87  | 4.88E-07  | 0.0345    |
|         |                  | Thyroid     | rs1030655   | 127773676 | -0.16  | 4.87E-07  | 8.95E-07  | 0.0296    | rs11717102 | 127727752 | 0.95  | 4.88E-07  | 0.0345    |
|         | <i>EEFSEC</i>    | Heart       | rs7632756   | 127817508 | 0.374  | 2.96E-09  | 2.48E-11  | 4.19E-05  | rs2955117  | 127881613 | 0.92  | 7.24E-12  | 0.0003    |
|         |                  | Testis      | rs4857868   | 127853473 | 0.52   | 1.37E-08  | 1.58E-08  | 0.00102   | rs2999047  | 127878330 | 0.98  | 1.21E-08  | 0.00094   |
|         |                  | Nerve       | rs7355887   | 127808502 | 0.322  | 1.56E-08  | 2.25E-11  | 4.31E-05  | rs2955117  | 127881613 | 0.89  | 7.24E-12  | 0.0003    |
|         |                  | fibroblasts | rs7355887   | 127808502 | 0.264  | 6.93E-08  | 2.25E-11  | 4.31E-05  | rs2955117  | 127881613 | 0.89  | 7.24E-12  | 0.0003    |
|         |                  | Esophagus   | rs2955117   | 127881613 | -0.343 | 8.58E-08  | 7.24E-12  | 0.0003    | rs2955117  | 127881613 | 1     | 7.24E-12  | 0.0003    |
|         |                  | Whole_Blood | rs7632756   | 127817508 | 0.128  | 5.73E-07  | 2.48E-11  | 4.19E-05  | rs2955117  | 127881613 | 0.92  | 7.24E-12  | 0.0003    |
|         |                  | Adipose     | rs2999049   | 127878817 | -0.242 | 6.49E-07  | 1.07E-11  | 5.08E-05  | rs2955117  | 127881613 | 0.96  | 7.24E-12  | 0.0003    |
|         |                  | Lung        | rs2811485   | 127919046 | -0.243 | 1.51E-06  | 1.87E-10  | 5.39E-05  | rs2955117  | 127881613 | 0.87  | 7.24E-12  | 0.0003    |
|         |                  | Breast      | rs2811485   | 127919046 | -0.312 | 5.72E-06  | 1.87E-10  | 5.39E-05  | rs2955117  | 127881613 | 0.87  | 7.24E-12  | 0.0003    |
|         |                  | Skin        | rs144609957 | 127869598 | -0.172 | 1.33E-05  | 2.76E-11  | 0.0002    | rs67451924 | 127867397 | 0.81  | 1.31E-11  | 4.25E-05  |
|         | <i>RUVBL1</i>    | Testis      | rs3849531   | 128058617 | 0.293  | 2.13E-08  | 2.71E-11  | 0.00035   | rs4857841  | 128046643 | 0.87  | 2.42E-11  | 9.58E-05  |
|         |                  | fibroblasts | rs1735546   | 128075398 | 0.095  | 1.26E-05  | 4.95E-09  | 6.39E-06  | rs1735545  | 128081260 | 0.85  | 2.98E-09  | 4.42E-06  |
| 4       | <i>LINC00339</i> | Testis      | rs10917123  | 22355978  | -0.574 | 5.47E-09  | 3.81E-08  | 1.23E-06  | rs10917123 | 22355978  | 1     | 3.81E-08  | 1.23E-06  |
|         |                  | Esophagus   | rs10917123  | 22355978  | -0.369 | 2.29E-06  | 3.81E-08  | 1.23E-06  | rs10917123 | 22355978  | 1     | 3.81E-08  | 1.23E-06  |
|         |                  | Skin        | rs10917123  | 22355978  | -0.345 | 7.41E-06  | 3.81E-08  | 1.23E-06  | rs10917123 | 22355978  | 1     | 3.81E-08  | 1.23E-06  |
|         | <i>WNT4</i>      | Thyroid     | rs12037376  | 22462111  | -0.389 | 3.16E-06  | 4.45E-09  | 2.33E-08  | rs56318008 | 22470407  | 0.91  | 1.15E-09  | 2.32E-07  |
| 5       | <i>SEC22A</i>    | Esophagus   | rs6771801   | 123082706 | -0.541 | 2.66E-10  | 4.69E-06  | 0.0571    | rs4383453  | 123068359 | 0.81  | 9.62E-08  | 0.164     |
|         |                  | Adipose     | rs11711950  | 123072318 | -0.383 | 3.10E-09  | 1.01E-06  | 8.54E-05  | rs6794803  | 123085337 | 0.9   | 5.52E-07  | 0.00023   |
|         |                  | Artery      | rs78519666  | 123065511 | -0.747 | 3.38E-09  | 2.64E-07  | 0.794     | rs78519666 | 123065511 | 1     | 2.64E-07  | 0.794     |
|         |                  | Lung        | rs78519666  | 123065511 | -0.574 | 2.96E-08  | 2.64E-07  | 0.794     | rs78519666 | 123065511 | 1     | 2.64E-07  | 0.794     |
|         |                  | Nerve       | rs6807089   | 123064089 | -0.42  | 3.52E-08  | 1.54E-06  | 6.96E-05  | rs9861425  | 123072883 | 0.85  | 6.12E-07  | 9.22E-06  |
|         |                  | Thyroid     | rs78519666  | 123065511 | -0.535 | 9.21E-07  | 2.64E-07  | 0.794     | rs78519666 | 123065511 | 1     | 2.64E-07  | 0.794     |
|         |                  | Vagina      | rs6771801   | 123082706 | -0.626 | 1.45E-06  | 4.69E-06  | 0.0571    | rs4383453  | 123068359 | 0.81  | 9.62E-08  | 0.164     |
|         |                  | Testis      | rs11711950  | 123072318 | -0.37  | 2.82E-06  | 1.01E-06  | 8.54E-05  | rs6794803  | 123085337 | 0.9   | 5.52E-07  | 0.00023   |

|   |               |                              |            |           |        |          |          |          |            |           |      |          |          |
|---|---------------|------------------------------|------------|-----------|--------|----------|----------|----------|------------|-----------|------|----------|----------|
|   |               | Muscle                       | rs2062432  | 123078079 | 0.225  | 1.18E-05 | 1.30E-06 | 1.89E-05 | rs6794803  | 123085337 | 0.89 | 5.52E-07 | 0.00023  |
|   | ADCY5         | Artery                       | rs60414302 | 123095547 | -0.27  | 3.03E-09 | 8.59E-06 | 0.0618   | rs4383453  | 123068359 | 0.81 | 9.62E-08 | 0.164    |
|   |               | Heart                        | rs62265764 | 123094758 | -0.335 | 3.18E-07 | 8.54E-06 | 0.0607   | rs4383453  | 123068359 | 0.81 | 9.62E-08 | 0.164    |
|   |               | Lung                         | rs55942221 | 123092958 | -0.263 | 5.98E-06 | 7.34E-06 | 0.0604   | rs4383453  | 123068359 | 0.81 | 9.62E-08 | 0.164    |
|   | RP11-797D24.4 | Artery                       | rs60414302 | 123095547 | -0.251 | 4.52E-08 | 8.59E-06 | 0.0618   | rs4383453  | 123068359 | 0.81 | 9.62E-08 | 0.164    |
|   |               | Heart                        | rs4677884  | 123062970 | 0.272  | 7.55E-08 | 1.60E-06 | 1.77E-05 | rs9861425  | 123072883 | 0.88 | 6.12E-07 | 9.22E-06 |
| 6 | MGC10955*     | Thyroid, Nerve, Adipose, ... | rs2421752  | 74341615  | 1.44   | 1.04E-46 | 1.96E-06 | 0.869    | rs4852329  | 74354544  | 0.89 | 9.18E-07 | 0.709    |
|   | FNBP1P1*      | Artery, Skin, Esophagus, ... | rs2122290  | 74358901  | 0.815  | 7.10E-24 | 1.60E-06 | 0.242    | rs4853012  | 74361290  | 0.81 | 1.05E-07 | 0.422    |
|   | DGUOK-AS1     | Esophagus                    | rs6721042  | 74217283  | -0.616 | 6.54E-08 | 4.30E-07 | 0.00256  | rs13390332 | 74207357  | 1    | 3.18E-07 | 0.00277  |
|   |               | Skin                         | rs13390332 | 74207357  | -0.475 | 6.89E-06 | 3.18E-07 | 0.00277  | rs13390332 | 74207357  | 1    | 3.18E-07 | 0.00277  |
|   | INO80B        | Artery                       | rs6721042  | 74217283  | -0.449 | 5.58E-06 | 4.30E-07 | 0.00256  | rs13390332 | 74207357  | 1    | 3.18E-07 | 0.00277  |
| 9 | KRT8P11       | Muscle                       | rs162621   | 102064575 | -0.674 | 1.38E-25 | 3.53E-07 | 0.757    | rs1622127  | 102063150 | 1    | 3.24E-07 | 0.79     |

This table shows the genes whose expression level were significantly associated (based on GTEx data) with the significant SNPs ( $P < 1 \times 10^{-6}$ , discovery stage) or their close proxies ( $r^2 > 0.8$ ).

@ For each gene/tissue combination, only the most significant eQTL SNP (with smallest  $P_{\text{QTL}}$ ) was shown.  $P_{\text{QTL}}$ : GTEx eQTL association  $P$  values;  $P_{\text{Dis}}$  and  $P_{\text{Rep}}$ : genetic association  $P$  values for the discovery and replication stage.

§ The most significant SNP (discovery stage) associate the phenotype that was in close LD ( $r^2 > 0.8$ ) with the eQTL SNP.

\* Expression levels of *MGC10955* (a hypothetical gene) and *FNBP1P1* (a pseudogene) were associated with the GWA SNPs in many tissues. Only the top one was shown to save space.

**Table S11. eQTLs in GWA loci associated with preterm birth**

| Region#        | Expression    |             | eQTL SNP  |           |          |           |           |            | GWA SNP    |           |          |           |           |
|----------------|---------------|-------------|-----------|-----------|----------|-----------|-----------|------------|------------|-----------|----------|-----------|-----------|
|                | Gene          | Tissue      | rs        | pos       | beta     | $P_{QTL}$ | $P_{Dis}$ | $P_{Rep}$  | rs         | pos       | $r^2$    | $P_{Dis}$ | $P_{Rep}$ |
| 2              | <i>EEFSEC</i> | Heart       | rs7632756 | 127817508 | 0.374    | 2.96E-09  | 3.32E-09  | 9.57E-06   | rs2955117  | 127881613 | 0.92     | 7.29E-10  | 8.46E-05  |
|                |               | Testis      | rs4857868 | 127853473 | 0.52     | 1.37E-08  | 5.91E-07  | 0.00023    | rs2811473  | 127884937 | 0.85     | 3.46E-07  | 8.66E-05  |
|                |               | Nerve       | rs7355887 | 127808502 | 0.322    | 1.56E-08  | 2.39E-09  | 9.93E-06   | rs2955117  | 127881613 | 0.89     | 7.29E-10  | 8.46E-05  |
|                |               | fibroblasts | rs7355887 | 127808502 | 0.264    | 6.93E-08  | 2.39E-09  | 9.93E-06   | rs2955117  | 127881613 | 0.89     | 7.29E-10  | 8.46E-05  |
|                |               | Esophagus   | rs2955117 | 127881613 | -0.343   | 8.58E-08  | 7.29E-10  | 8.46E-05   | rs2955117  | 127881613 | 1        | 7.29E-10  | 8.46E-05  |
|                |               | Whole_Blood | rs7632756 | 127817508 | 0.128    | 5.73E-07  | 3.32E-09  | 9.57E-06   | rs2955117  | 127881613 | 0.92     | 7.29E-10  | 8.46E-05  |
|                |               | Adipose     | rs2999049 | 127878817 | -0.242   | 6.49E-07  | 1.15E-09  | 1.15E-05   | rs4857841  | 128046643 | 0.83     | 2.04E-10  | 2.80E-05  |
|                |               | Lung        | rs2811485 | 127919046 | -0.243   | 1.51E-06  | 6.96E-09  | 2.06E-05   | rs4857841  | 128046643 | 0.81     | 2.04E-10  | 2.80E-05  |
|                |               | Breast      | rs2811485 | 127919046 | -0.312   | 5.72E-06  | 6.96E-09  | 2.06E-05   | rs4857841  | 128046643 | 0.81     | 2.04E-10  | 2.80E-05  |
|                | Skin          | rs144609957 | 127869598 | -0.172    | 1.33E-05 | 9.87E-09  | 3.11E-05  | rs67451924 | 127867397  | 0.81      | 1.66E-09 | 9.38E-06  |           |
|                | <i>RUVBL1</i> | Testis      | rs3849531 | 128058617 | 0.293    | 2.13E-08  | 1.60E-10  | 7.89E-05   | rs3849531  | 128058617 | 1        | 1.60E-10  | 7.89E-05  |
|                |               | fibroblasts | rs1735546 | 128075398 | 0.095    | 1.26E-05  | 1.05E-08  | 7.75E-06   | rs1735545  | 128081260 | 0.85     | 6.65E-09  | 1.14E-06  |
| <i>SEC61A1</i> | fibroblasts   | rs4857837   | 127836319 | -0.141    | 1.11E-06 | 2.71E-09  | 9.10E-06  | rs2955117  | 127881613  | 0.92      | 7.29E-10 | 8.46E-05  |           |
| 3              | <i>TEKT3</i>  | Breast      | rs2024157 | 15196537  | -0.456   | 7.95E-07  | 5.58E-07  | 0.0646     | rs66847224 | 15195812  | 0.99     | 3.98E-07  | 0.0638    |

Notation: similar to Table S10.

**Table S12. Replication of GWA loci associated with gestational age using infant samples**

| No | Chr               | From             | To         | Genes                                            | SNP Information       |                  |                 |            | Discovery Phase |               |                 |                |                | Replication Phase |               |               |              | Joint analysis  |            |
|----|-------------------|------------------|------------|--------------------------------------------------|-----------------------|------------------|-----------------|------------|-----------------|---------------|-----------------|----------------|----------------|-------------------|---------------|---------------|--------------|-----------------|------------|
|    |                   |                  |            |                                                  | rs                    | pos              | A/B             | AA         | Freq            | Eff           | P-value         | Rank           | r <sup>2</sup> | Freq              | Eff           | P-value       | P.hetero     | P-value         | Directions |
| 1  | chr5              | 157408195        | 158308569  | <i>EBF1</i>                                      | <b>rs2963463</b> MC   | <b>157895049</b> | C/T             | T          | <b>0.272</b>    | <b>-1.29</b>  | <b>1.03E-21</b> | <b>1</b>       | -              | <b>0.25</b>       | <b>-0.372</b> | <b>0.503</b>  | <b>0.294</b> | <b>2.87E-21</b> | <b>+++</b> |
|    |                   |                  |            |                                                  | rs201770678           | 157894745        | D/I             |            | 0.267           | -1.29         | 1.71E-21        | 2              | 0.865          | 0.258             | -0.317        | 0.57          | 0.439        | 5.94E-21        | +++        |
|    |                   |                  |            |                                                  | rs12520982            | 157894747        | T/C             | T          | 0.266           | -1.29         | 2.47E-21        | 3              | 0.848          | 0.264             | -0.364        | 0.516         | 0.361        | 6.90E-21        | +++        |
|    |                   |                  |            |                                                  | rs7729301bwt          | 157886953        | A/G             | G          | 0.265           | -1.28         | 9.39E-21        | 13             | 0.915          | 0.241             | -0.418        | 0.458         | 0.343        | 2.11E-20        | +++        |
|    |                   |                  |            |                                                  | rs2946171MM           | 157921940        | T/G             | T          | 0.219           | -1.24         | 1.11E-17        | 24             | 0.708          | 0.188             | -0.891        | 0.146         | 0.546        | 4.37E-18        | +++        |
|    |                   |                  |            |                                                  | <i>rs2964494</i>      | <i>157925562</i> | <i>A/G</i>      |            | <i>0.223</i>    | <i>-1.22</i>  | <i>2.92E-17</i> | <i>33</i>      | <i>0.695</i>   | <i>0.191</i>      | <i>-1.11</i>  | <i>0.0687</i> | <i>0.391</i> | <i>5.45E-18</i> | <i>+++</i> |
| 2  | chr3              | 127460474        | 128372820  | <i>EEFSEC</i><br><i>RUVBL1</i><br><i>SEC61A1</i> | <b>rs2955117</b>      | <b>127881613</b> | G/A             | A          | <b>0.286</b>    | <b>0.911</b>  | <b>7.24E-12</b> | <b>1</b>       |                | <b>0.282</b>      | <b>0.947</b>  | <b>0.0724</b> | <b>0.692</b> | <b>1.39E-12</b> | <b>+++</b> |
|    |                   |                  |            |                                                  | rs2999049             | 127878817        | T/C             | C          | 0.273           | 0.914         | 1.07E-11        | 2              | 0.955          | 0.273             | 0.925         | 0.0795        | 0.629        | 2.20E-12        | +++        |
|    |                   |                  |            |                                                  | rs2461794             | 127870060        | G/A             | N          | 0.273           | 0.911         | 1.21E-11        | 3              | 0.861          | 0.278             | 0.85          | 0.111         | 0.649        | 3.35E-12        | +++        |
|    |                   |                  |            |                                                  | <b>rs200745338</b> MC | <b>127869457</b> | <b>D/I</b>      | <b>-</b>   | <b>0.237</b>    | <b>0.986</b>  | <b>1.50E-11</b> | <b>8</b>       | <b>0.724</b>   | <b>0.233</b>      | <b>1.36</b>   | <b>0.0202</b> | <b>0.534</b> | <b>1.16E-12</b> | <b>+++</b> |
|    |                   |                  |            |                                                  | rs10934853GWA         | 128038373        | C/A             | A          | 0.274           | 0.894         | 2.43E-11        | 17             | 0.785          | 0.276             | 0.868         | 0.0987        | 0.517        | 5.96E-12        | +++        |
|    |                   |                  |            |                                                  | rs2999052GWA          | 127892037        | T/C             | C          | 0.27            | 0.889         | 4.02E-11        | 24             | 0.949          | 0.272             | 0.986         | 0.0618        | 0.668        | 6.86E-12        | +++        |
|    |                   |                  |            |                                                  | rs2687729GWA          | 127895226        | A/G             | G          | 0.27            | 0.889         | 4.04E-11        | 25             | 0.949          | 0.272             | 0.985         | 0.0619        | 0.669        | 6.90E-12        | +++        |
|    |                   |                  |            |                                                  | rs2811474GWA          | 127892851        | G/C             | G          | 0.157           | 0.858         | 2.42E-07        | 234            | 0.424          | 0.157             | 1.73          | 0.00764       | 0.856        | 1.48E-08        | +++        |
|    | <i>rs72104653</i> | <i>127971489</i> | <i>I/D</i> |                                                  | <i>0.134</i>          | <i>0.894</i>     | <i>8.74E-07</i> | <i>248</i> | <i>0.445</i>    | <i>0.15</i>   | <i>2</i>        | <i>0.00259</i> | <i>0.756</i>   | <i>3.01E-08</i>   | <i>+++</i>    |               |              |                 |            |
| 3  | chrX              | 114879442        | 115442159  | <i>AGTR2</i><br><i>PLS3</i>                      | <b>rs201226733</b>    | <b>115164770</b> | <b>I/D</b>      | <b>-</b>   | <b>0.422</b>    | <b>-0.82</b>  | <b>5.71E-11</b> | <b>1</b>       | -              | <b>0.428</b>      | <b>-0.473</b> | <b>0.225</b>  | <b>0.21</b>  | <b>3.83E-11</b> | <b>+++</b> |
|    |                   |                  |            |                                                  | rs201386833           | 115164281        | D/I             |            | 0.41            | -0.837        | 6.52E-11        | 2              | 0.925          | 0.418             | -0.431        | 0.279         | 0.145        | 5.79E-11        | ++         |
|    |                   |                  |            |                                                  | rs35401609            | 115164771        | I/D             |            | 0.421           | -0.816        | 6.69E-11        | 3              | 1              | 0.428             | -0.472        | 0.226         | 0.208        | 4.45E-11        | ++         |
|    |                   |                  |            |                                                  | rs5950491MC           | 115129714        | C/A             | C          | 0.423           | -0.826        | 6.84E-11        | 5              | 0.917          | 0.433             | -0.5          | 0.211         | 0.221        | 4.19E-11        | ++         |
|    |                   |                  |            |                                                  | <i>rs200165362</i>    | <i>115192158</i> | <i>I/D</i>      |            | <i>0.487</i>    | <i>0.667</i>  | <i>1.81E-07</i> | <i>38</i>      | <i>0.624</i>   | <i>0.465</i>      | <i>0.641</i>  | <i>0.123</i>  | <i>0.754</i> | <i>5.33E-08</i> | <i>+++</i> |
| 4  | chr1              | 22097396         | 22843805   | <i>WNT4</i><br><i>CDC42</i><br><i>CELA3A</i>     | <b>rs56318008</b>     | <b>22470407</b>  | <b>C/T</b>      | <b>C</b>   | <b>0.139</b>    | <b>1.05</b>   | <b>1.15E-09</b> | <b>1</b>       |                | <b>0.155</b>      | <b>1.55</b>   | <b>0.0196</b> | <b>0.807</b> | <b>9.23E-11</b> | <b>+++</b> |
|    |                   |                  |            |                                                  | rs55938609MC          | 22470451         | G/C             | G          | 0.139           | 1.05          | 1.15E-09        | 2              | 1              | 0.155             | 1.55          | 0.0196        | 0.807        | 9.15E-11        | +++        |
|    |                   |                  |            |                                                  | rs3820282GWA          | 22468215         | C/T             | C          | 0.144           | 1             | 4.25E-09        | 3              | 0.935          | 0.157             | 1.34          | 0.0416        | 0.787        | 5.73E-10        | +++        |
|    |                   |                  |            |                                                  | rs12037376MM          | 22462111         | G/A             | g          | 0.145           | 1             | 4.45E-09        | 4              | 0.914          | 0.159             | 1.39          | 0.0334        | 0.799        | 5.18E-10        | +++        |
|    |                   |                  |            |                                                  | rs3765350GWA          | 22447316         | A/G             | A          | 0.203           | 0.833         | 2.14E-08        | 8              | 0.633          | 0.212             | 1.19          | 0.0396        | 0.375        | 2.93E-09        | +++        |
|    |                   |                  |            |                                                  | rs2235529GWA          | 22450487         | C/T             | C          | 0.143           | 0.95          | 2.46E-08        | 10             | 0.896          | 0.161             | 1.36          | 0.0365        | 0.863        | 3.16E-09        | +++        |
| 5  | chr3              | 122668928        | 123372314  | <i>ADCY5</i><br><i>SEC22A</i><br><i>HACD2</i>    | <b>rs4383453</b>      | <b>123068359</b> | <b>G/A</b>      | <b>G</b>   | <b>0.2</b>      | <b>-0.808</b> | <b>9.62E-08</b> | <b>1</b>       |                | <b>0.205</b>      | <b>0.156</b>  | <b>0.795</b>  | <b>0.846</b> | <b>3.27E-07</b> | <b>+++</b> |
|    |                   |                  |            |                                                  | rs78519666            | 123065511        | T/A             | t          | 0.103           | -1.14         | 2.64E-07        | 2              | 0.475          | 0.103             | 0.752         | 0.379         | 0.63         | 1.91E-06        | --         |
|    |                   |                  |            |                                                  | rs6794803             | 123085337        | T/C             | T          | 0.463           | -0.6          | 5.52E-07        | 3              | 0.321          | 0.483             | -0.735        | 0.12          | 0.154        | 1.64E-07        | +++        |

|    |       |           |           |                           |                       |                  |            |          |               |               |                 |           |              |               |                |               |               |                 |     |
|----|-------|-----------|-----------|---------------------------|-----------------------|------------------|------------|----------|---------------|---------------|-----------------|-----------|--------------|---------------|----------------|---------------|---------------|-----------------|-----|
|    |       |           |           |                           | <i>rs9861425</i> MC   | <u>123072883</u> | A/C        | C        | <i>0.453</i>  | <i>-0.598</i> | <u>6.12E-07</u> | 5         | <i>0.344</i> | <i>0.468</i>  | <i>-0.853</i>  | <i>0.0713</i> | <i>0.107</i>  | <u>1.31E-07</u> | +++ |
| 6  | chr2  | 73950833  | 74611290  | BOLA3<br>MOB1A<br>TET3    | <b>rs4853012</b>      | <b>74361290</b>  | G/A        | G        | <b>0.141</b>  | <b>-0.92</b>  | <b>1.05E-07</b> | <b>1</b>  | -            | <b>0.145</b>  | <b>-0.652</b>  | <b>0.337</b>  | <b>0.0064</b> | <b>7.02E-08</b> | +++ |
|    |       |           |           |                           | rs13390332MC          | 74207357         | G/A        | G        | 0.0579        | -1.33         | 3.18E-07        | 2         | 0.129        | 0.0554        | -0.854         | 0.428         | 0.548         | 2.51E-07        | +++ |
|    |       |           |           |                           | rs6721042             | 74217283         | G/T        | G        | 0.0587        | -1.31         | 4.30E-07        | 3         | 0.129        | 0.0549        | -1.12          | 0.3           | 0.489         | 2.50E-07        | +++ |
|    |       |           |           |                           | rs17009553MM          | 74220035         | G/A        | G        | 0.0567        | -1.28         | 1.14E-06        | 6         | 0.129        | 0.0548        | -1.14          | 0.29          | 0.483         | 6.42E-07        | +++ |
|    |       |           |           |                           | <i>rs71418714</i>     | <i>74219886</i>  | <i>G/C</i> | <i>G</i> | <i>0.0549</i> | <i>-1.27</i>  | <i>2.19E-06</i> | <i>24</i> | <i>0.152</i> | <i>0.0537</i> | <i>-1.25</i>   | <i>0.248</i>  | <i>0.419</i>  | <i>1.09E-06</i> | +++ |
| 7  | chr9  | 16149953  | 16719213  | BNC2<br>C9orf92           | <b>rs717267</b> MC    | <b>16408826</b>  | G/A        | G        | <b>0.399</b>  | <b>-0.637</b> | <b>1.67E-07</b> | <b>1</b>  | -            | <b>0.415</b>  | <b>-0.433</b>  | <b>0.37</b>   | <b>0.601</b>  | <b>1.20E-07</b> | +++ |
|    |       |           |           |                           | rs6475050             | 16407780         | G/A        | A        | 0.399         | -0.63         | 2.44E-07        | 2         | 0.978        | 0.415         | -0.31          | 0.523         | 0.653         | 2.43E-07        | +++ |
|    |       |           |           |                           | <b>rs10810563</b>     | <b>16399953</b>  | <b>G/T</b> | <b>T</b> | <b>0.408</b>  | <b>-0.643</b> | <b>2.72E-07</b> | <b>3</b>  | <b>0.882</b> | <b>0.41</b>   | <b>-0.658</b>  | <b>0.186</b>  | <b>0.642</b>  | <b>1.11E-07</b> | +++ |
|    |       |           |           |                           | rs9298764MM           | 16431230         | A/G        | G        | 0.456         | -0.55         | 5.21E-06        | 19        | 0.807        | 0.462         | -0.707         | 0.145         | 0.794         | 1.82E-06        | +++ |
| 8  | chr1  | 91984421  | 92490753  | TGFBFR3<br>BRDT<br>CDC7   | <b>rs4658267</b> MC   | <b>92240753</b>  | <b>C/A</b> | <b>C</b> | <b>0.319</b>  | <b>0.679</b>  | <b>1.87E-07</b> | <b>1</b>  | -            | <b>0.329</b>  | <b>-0.0183</b> | <b>0.972</b>  | <b>0.221</b>  | <b>4.64E-07</b> | +++ |
|    |       |           |           |                           | rs4658265MM           | 92240685         | C/T        | T        | 0.312         | 0.662         | 4.84E-07        | 2         | 0.914        | 0.322         | 0.147          | 0.774         | 0.344         | 7.57E-07        | +++ |
|    |       |           |           |                           | rs284201              | 92240238         | C/T        | C        | 0.283         | 0.59          | 1.15E-05        | 3         | 0.802        | 0.283         | -0.0398        | 0.941         | 0.365         | 2.27E-05        | ++  |
| 9  | chr9  | 101806013 | 102324119 | SEC61B<br>ALG2<br>TGFBFR1 | <b>rs182704</b> MC    | <b>102068912</b> | <b>T/C</b> | <b>C</b> | <b>0.344</b>  | <b>0.658</b>  | <b>2.07E-07</b> | <b>1</b>  | -            | <b>0.398</b>  | <b>0.414</b>   | <b>0.42</b>   | <b>0.14</b>   | <b>1.65E-07</b> | +++ |
|    |       |           |           |                           | rs1622127             | 102063150        | A/C        | C        | 0.336         | 0.644         | 3.24E-07        | 2         | 0.764        | 0.35          | 0.317          | 0.521         | 0.393         | 3.23E-07        | +++ |
|    |       |           |           |                           | rs162621              | 102064575        | T/C        | C        | 0.336         | 0.643         | 3.53E-07        | 3         | 0.764        | 0.35          | 0.329          | 0.506         | 0.386         | 3.44E-07        | +++ |
| 10 | chr6  | 30552017  | 31173629  | SFTA2<br>VARS2<br>DPCR1   | <b>rs2532929</b> MC   | <b>30897774</b>  | <b>A/G</b> | <b>G</b> | <b>0.397</b>  | <b>-0.622</b> | <b>4.19E-07</b> | <b>1</b>  | -            | <b>0.413</b>  | <b>-0.08</b>   | <b>0.87</b>   | <b>0.378</b>  | <b>7.56E-07</b> | +++ |
|    |       |           |           |                           | rs2532927             | 30898434         | A/G        | G        | 0.367         | -0.557        | 7.96E-06        | 2         | 0.902        | 0.387         | 0.101          | 0.837         | 0.752         | 1.89E-05        | +++ |
|    |       |           |           |                           | rs2532926MM           | 30898441         | A/G        | G        | 0.363         | -0.556        | 9.02E-06        | 3         | 0.866        | 0.383         | 0.0937         | 0.849         | 0.763         | 2.08E-05        | +++ |
| 11 | chrX  | 130986215 | 131826714 | RAP2C<br>FRMD7<br>STK26   | <b>rs200879388</b> MC | <b>131300571</b> | <b>I/D</b> | <b>-</b> | <b>0.351</b>  | <b>-0.662</b> | <b>4.52E-07</b> | <b>1</b>  | -            | <b>0.357</b>  | <b>-0.727</b>  | <b>0.0859</b> | <b>0.969</b>  | <b>9.87E-08</b> | +++ |
|    |       |           |           |                           | rs2999094             | 131268226        | C/T        | T        | 0.3           | -0.596        | 5.59E-06        | 2         | 0.407        | 0.312         | -0.813         | 0.0527        | 0.617         | 8.98E-07        | +++ |
|    |       |           |           |                           | rs2747027             | 131268092        | T/G        | T        | 0.3           | -0.596        | 5.60E-06        | 3         | 0.407        | 0.312         | -0.814         | 0.0524        | 0.617         | 8.97E-07        | +++ |
| 12 | chr10 | 28061621  | 28598815  | MPP7<br>ARMC4             | <b>rs2253165</b> MC   | <b>28337017</b>  | <b>A/G</b> | <b>G</b> | <b>0.44</b>   | <b>-0.594</b> | <b>9.33E-07</b> | <b>1</b>  | -            | <b>0.427</b>  | <b>0.522</b>   | <b>0.29</b>   | <b>0.891</b>  | <b>6.43E-06</b> | +++ |
|    |       |           |           |                           | rs2245244MM           | 28316456         | T/C        | T        | 0.438         | -0.561        | 3.69E-06        | 2         | 0.86         | 0.421         | 0.471          | 0.333         | 0.673         | 2.07E-05        | +++ |
|    |       |           |           |                           | <i>rs2253011</i>      | <i>28335832</i>  | <i>C/T</i> | <i>C</i> | <i>0.434</i>  | <i>-0.551</i> | <i>5.70E-06</i> | <i>3</i>  | <i>0.885</i> | <i>0.416</i>  | <i>0.596</i>   | <i>0.228</i>  | <i>0.802</i>  | <i>3.81E-05</i> | +++ |

Notation: similar to Table S7. For each locus, the SNP with the smallest replication  $P$ -value in infants is shown in *italic*; the index SNP (the SNP with the smallest discovery  $P$ -value in 23andMe mothers) is shown in **bold**, and the SNP with the smallest joint-analysis  $P$ -value is underlined. SNPs with smallest joint  $P$ -value and replication  $P$ -value in maternal association test (Table S6) are labeled by MC and MM, respectively.

**Table S13. Replication of GWA loci associated with preterm birth using infant samples**

| No | Chr   | From      | To        | Genes                                               | SNP Information           |                  |     |    | Discovery Phase |              |                 |          |                | Replication Phase |              |              |               | Joint analysis  |            |
|----|-------|-----------|-----------|-----------------------------------------------------|---------------------------|------------------|-----|----|-----------------|--------------|-----------------|----------|----------------|-------------------|--------------|--------------|---------------|-----------------|------------|
|    |       |           |           |                                                     | rs                        | pos              | A/B | AA | Freq            | Eff          | P-value         | Rank     | r <sup>2</sup> | Freq              | Eff          | P-value      | P.hetero      | P-value         | Directions |
| 1  | chr5  | 157374012 | 158280813 | <i>EBF1</i>                                         | <b>rs2963463</b>          | <b>157895049</b> | C/T | T  | <b>0.272</b>    | <b>1.23</b>  | <b>3.15E-13</b> | <b>1</b> |                | <b>0.25</b>       | <b>1.04</b>  | <b>0.402</b> | <b>0.416</b>  | <b>5.30E-12</b> | <b>+++</b> |
|    |       |           |           |                                                     | rs2964484                 | 157897437        | A/G | A  | 0.266           | 1.23         | 4.22E-13        | 2        | 0.934          | 0.248             | 1.06         | 0.289        | 0.458         | 3.28E-12        | +++        |
|    |       |           |           |                                                     | rs2419911                 | 157898103        | G/T |    | 0.266           | 1.23         | 4.22E-13        | 3        | 0.947          | 0.247             | 1.05         | 0.377        | 0.441         | 7.26E-12        | +++        |
|    |       |           |           |                                                     | rs12520982MC              | 157894747        | T/C | T  | 0.266           | 1.23         | 5.52E-13        | 6        | 0.848          | 0.264             | 1.04         | 0.405        | 0.444         | 8.60E-12        | +++        |
|    |       |           |           |                                                     | rs7729301bwt              | 157886953        | A/G | G  | 0.265           | 1.21         | 1.93E-11        | 14       | 0.915          | 0.241             | 1.06         | 0.302        | 0.34          | 1.02E-10        | +++        |
|    |       |           |           |                                                     | rs2946169MM               | 157918959        | C/T | T  | 0.217           | 1.22         | 1.09E-10        | 19       | 0.684          | 0.189             | 1.04         | 0.446        | 0.907         | 7.50E-10        | +++        |
|    |       |           |           |                                                     | rs11135035                | 157900829        | A/G | G  | 0.358           | 1.16         | 5.79E-08        | 46       | 0.393          | 0.333             | 1.06         | 0.195        | 0.388         | 7.16E-08        | +++        |
| 2  | chr3  | 127460474 | 128373786 | <i>EEFSEC</i><br><i>DNAJB8</i><br><i>GATA2</i>      | <b>rs201450565</b>        | <b>128058610</b> | D/I |    | <b>0.233</b>    | <b>0.81</b>  | <b>1.43E-10</b> | <b>1</b> |                | <b>0.135</b>      | <b>1</b>     | <b>0.972</b> | <b>0.316</b>  | <b>7.75E-09</b> | <b>-+-</b> |
|    |       |           |           |                                                     | rs3849531                 | 128058617        | A/T | T  | 0.277           | 0.826        | 1.60E-10        | 2        | 0.414          | 0.27              | 0.95         | 0.314        | 0.524         | 2.75E-09        | +-         |
|    |       |           |           |                                                     | rs4857841                 | 128046643        | G/A | A  | 0.274           | 0.828        | 2.04E-10        | 3        | 0.383          | 0.276             | 0.936        | 0.191        | 0.35          | 1.55E-09        | +-         |
|    |       |           |           |                                                     | rs10934853 <sup>GWA</sup> | 128038373        | C/A | A  | 0.274           | 0.828        | 2.04E-10        | 4        | 0.383          | 0.276             | 0.938        | 0.198        | 0.337         | 1.75E-09        | +-         |
|    |       |           |           |                                                     | rs2687729 <sup>GWA</sup>  | 127895226        | A/G | G  | 0.27            | 0.835        | 1.48E-09        | 61       | 0.28           | 0.272             | 0.929        | 0.144        | 0.488         | 4.58E-09        | +++        |
|    |       |           |           |                                                     | rs2999052 <sup>GWA</sup>  | 127892037        | T/C | C  | 0.27            | 0.835        | 1.49E-09        | 63       | 0.28           | 0.272             | 0.929        | 0.143        | 0.488         | 4.77E-09        | +++        |
|    |       |           |           |                                                     | rs200745338MC             | 127869457        | D/I |    | 0.237           | 0.829        | 9.01E-09        | 95       | 0.239          | 0.233             | 0.916        | 0.113        | 0.569         | 1.36E-08        | +++        |
|    |       |           |           |                                                     | rs2248668                 | 127890749        | A/G | G  | 0.151           | 0.831        | 9.71E-07        | 190      | 0.091          | 0.145             | 0.861        | 0.0191       | 0.897         | 1.01E-07        | +++        |
|    |       |           |           |                                                     | rs2811474 <sup>GWA</sup>  | 127892851        | G/C | G  | 0.157           | 0.84         | 2.70E-06        | 236      | 0.078          | 0.157             | 0.885        | 0.0488       | 0.594         | 7.23E-07        | +++        |
| 3  | chr17 | 14923221  | 15498449  | <i>TEKT3</i><br><i>PMP22</i><br><i>TVP23C-CDRT4</i> | <b>rs7217780MC</b>        | <b>15191024</b>  | T/C | C  | <b>0.336</b>    | <b>1.15</b>  | <b>3.52E-07</b> | <b>1</b> | -              | <b>0.33</b>       | <b>1.08</b>  | <b>0.112</b> | <b>0.884</b>  | <b>1.57E-07</b> | <b>+++</b> |
|    |       |           |           |                                                     | rs66847224                | 15195812         | D/I |    | 0.344           | 1.15         | 3.98E-07        | 2        | 0.746          | 0.335             | 1.06         | 0.192        | 0.669         | 4.00E-07        | +++        |
|    |       |           |           |                                                     | rs2024157                 | 15196537         | T/C | C  | 0.343           | 1.15         | 5.58E-07        | 3        | 0.752          | 0.334             | 1.06         | 0.183        | 0.672         | 4.87E-07        | +++        |
|    |       |           |           |                                                     | rs1380181 <sup>GWA</sup>  | 15193056         | G/A | G  | 0.314           | 1.14         | 3.57E-06        | 10       | 0.908          | 0.318             | 1.08         | 0.0994       | 0.794         | 1.13E-06        | +++        |
|    |       |           |           |                                                     | rs179521MM                | 15173221         | C/A | A  | 0.359           | 1.13         | 3.84E-06        | 11       | 0.805          | 0.352             | 1.08         | 0.109        | 0.858         | 1.36E-06        | +++        |
|    |       |           |           |                                                     | rs9944503                 | 15185523         | G/A | G  | 0.326           | 1.14         | 4.56E-06        | 18       | 0.83           | 0.329             | 1.09         | 0.0735       | 0.719         | 1.13E-06        | +++        |
| 4  | chr19 | 41601042  | 42101042  | <i>TGFB1</i><br><i>B9D2</i><br><i>TMEM91</i>        | <b>rs11466328MC</b>       | <b>41851042</b>  | G/A | G  | <b>0.0288</b>   | <b>0.567</b> | <b>5.31E-07</b> | <b>1</b> | -              | <b>0.0303</b>     | <b>0.879</b> | <b>0.539</b> | <b>0.381</b>  | <b>1.22E-05</b> | <b>+-</b>  |
|    |       |           |           |                                                     | rs139581508               | 41888023         | C/T | c  | 0.0146          | 1.31         | 0.00857         | 2        | 0.001          | 0.0197            | 0.866        | 0.397        | 0.598         | 0.0539          | +-         |
|    |       |           |           |                                                     | rs8108632                 | 41854534         | A/T | t  | 0.458           | 1.07         | 0.011           | 3        | 0.012          | 0.443             | 1.09         | 0.0649       | 0.865         | 0.0019          | +++        |
| 5  | chrX  | 114879714 | 115434372 | <i>AGTR2</i><br><i>PLS3</i>                         | <b>rs201386833</b>        | <b>115164281</b> | D/I |    | <b>0.41</b>     | <b>1.15</b>  | <b>8.45E-07</b> | <b>1</b> |                | <b>0.418</b>      | <b>1.02</b>  | <b>0.524</b> | <b>0.0764</b> | <b>1.33E-05</b> | <b>+-</b>  |
|    |       |           |           |                                                     | rs5991030MC               | 115129904        | T/C | T  | 0.417           | 1.15         | 8.59E-07        | 2        | 0.851          | 0.43              | 1.03         | 0.433        | 0.108         | 8.83E-06        | +-         |
|    |       |           |           |                                                     | rs62602480                | 115137917        | C/T | C  | 0.419           | 1.14         | 8.77E-07        | 3        | 0.871          | 0.431             | 1.03         | 0.449        | 0.0992        | 1.03E-05        | +-         |
|    |       |           |           |                                                     | rs5950506MM               | 115175748        | G/A | G  | 0.42            | 1.14         | 1.22E-06        | 10       | 0.918          | 0.427             | 1.03         | 0.416        | 0.0881        | 1.06E-05        | +-         |
|    |       |           |           |                                                     | rs6608550                 | 115178556        | A/G |    | 0.422           | 1.14         | 1.46E-06        | 15       | 0.912          | 0.43              | 1.03         | 0.405        | 0.085         | 1.19E-05        | +-         |

Notation: similar to Table S12.

**Table S14. Comparison of effect sizes estimated from mothers and infants**

| Region                 | Chr | SNP         | pos       | alleles | Mother |      |       | Infant |      |       |
|------------------------|-----|-------------|-----------|---------|--------|------|-------|--------|------|-------|
|                        |     |             |           |         | eff    | se   | beta  | eff    | se   | beta  |
| <u>Gestational age</u> |     |             |           |         |        |      |       |        |      |       |
| <i>EBF1</i>            | 5   | rs2946171   | 157921940 | T/G     | -1.46  | 0.38 | -3.81 | -0.89  | 0.61 | -1.45 |
| <i>EEFSEC</i>          | 3   | rs200745338 | 127869457 | D/I     | 1.91   | 0.39 | 4.94  | 1.36   | 0.59 | 2.32  |
| <i>AGTR2</i>           | X   | rs5950491   | 115129714 | C/A     | -1.75  | 0.32 | -5.47 | -0.50  | 0.40 | -1.25 |
| <i>WNT4</i>            | 1   | rs12037376  | 22462111  | G/A     | 2.41   | 0.43 | 5.60  | 1.39   | 0.65 | 2.13  |
| <i>ADCY5</i>           | 3   | rs9861425   | 123072883 | A/C     | -1.38  | 0.31 | -4.42 | -0.85  | 0.47 | -1.80 |
| <i>RAP2C</i>           | X   | rs200879388 | 131300571 | I/D     | -1.10  | 0.33 | -3.31 | -0.73  | 0.42 | -1.72 |
| <i>BOLA3</i>           | 2   | rs17009553  | 74220035  | G/A     | -2.11  | 0.68 | -3.08 | -1.14  | 1.08 | -1.06 |
| <u>Preterm birth*</u>  |     |             |           |         |        |      |       |        |      |       |
| <i>EBF1</i>            | 5   | rs2946169   | 157918959 | C/T     | -0.15  | 0.04 | -3.50 | -0.04  | 0.06 | -0.68 |
| <i>EEFSEC</i>          | 3   | rs200745338 | 127869457 | D/I     | 0.23   | 0.04 | 5.09  | 0.10   | 0.05 | 1.93  |
| <i>AGTR2</i>           | X   | rs5950506   | 115175748 | G/A     | -0.17  | 0.03 | -4.76 | -0.03  | 0.04 | -0.81 |
| <i>TEKT3</i>           | 17  | rs179521    | 15173221  | C/A     | -0.10  | 0.04 | -2.60 | -0.08  | 0.05 | -1.63 |
| <i>TGFB1</i>           | 19  | rs11466328  | 41851042  | G/A     | 0.37   | 0.14 | 2.68  | 0.12   | 0.17 | 0.72  |

\* For gestational age, effect is unstandardized regression coefficient, which shows the estimated changes in gestational days per allele. The effect size for preterm birth was given by log(OR). Beta is the standardized coefficient.



**Table S15. Joint maternal and fetal genetic association analysis in mother/infant pairs**

| Locus                  | chr | rs          | pos       | alleles | Maternal* |       |        |               | Fetal  |       |        |       |
|------------------------|-----|-------------|-----------|---------|-----------|-------|--------|---------------|--------|-------|--------|-------|
|                        |     |             |           |         | eff       | se    | beta   | P             | eff    | se    | beta   | P     |
| <i>Gestational age</i> |     |             |           |         |           |       |        |               |        |       |        |       |
| <i>EBF1</i>            | 5   | rs2946171   | 157921940 | T/G     | -0.880    | 0.722 | -1.218 | 0.223         | 0.121  | 0.761 | 0.159  | 0.874 |
| <i>EEFSEC</i>          | 3   | rs200745338 | 127869457 | D/I     | 1.060     | 0.689 | 1.538  | 0.124         | 0.725  | 0.679 | 1.068  | 0.286 |
| <i>AGTR2</i>           | X   | rs5950491   | 115129714 | C/A     | -1.995    | 0.650 | -3.070 | <b>0.002</b>  | 0.129  | 0.525 | 0.246  | 0.806 |
| <i>WNT4</i>            | 1   | rs12037376  | 22462111  | G/A     | 2.885     | 0.793 | 3.638  | <b>0.0003</b> | 0.168  | 0.786 | 0.214  | 0.831 |
| <i>ADCY5</i>           | 3   | rs9861425   | 123072883 | A/C     | -0.979    | 0.594 | -1.649 | 0.099         | -0.545 | 0.582 | -0.936 | 0.349 |
| <i>RAP2C</i>           | X   | rs200879388 | 131300571 | I/D     | -1.026    | 0.665 | -1.543 | 0.123         | -0.038 | 0.550 | -0.068 | 0.945 |
| <i>BOLA3</i>           | 2   | rs17009553  | 74220035  | G/A     | -2.526    | 1.340 | -1.885 | 0.059         | -0.034 | 1.361 | -0.025 | 0.980 |
| <i>Preterm birth</i>   |     |             |           |         |           |       |        |               |        |       |        |       |
| <i>EBF1</i>            | 5   | rs2946169   | 157918959 | C/T     | 0.127     | 0.069 | 1.839  | 0.066         | -0.048 | 0.073 | -0.652 | 0.514 |
| <i>EEFSEC</i>          | 3   | rs200745338 | 127869457 | D/I     | -0.169    | 0.068 | -2.496 | <b>0.013</b>  | -0.026 | 0.066 | -0.397 | 0.692 |
| <i>AGTR2</i>           | X   | rs5950506   | 115175748 | G/A     | 0.188     | 0.063 | 2.974  | <b>0.003</b>  | -0.036 | 0.051 | -0.699 | 0.484 |
| <i>TEKT3</i>           | 17  | rs179521    | 15173221  | C/A     | 0.117     | 0.059 | 1.979  | <b>0.048</b>  | 0.053  | 0.059 | 0.904  | 0.366 |
| <i>TGFB1</i>           | 19  | rs11466328  | 41851042  | G/A     | -0.507    | 0.453 | -1.119 | 0.263         | 0.061  | 0.316 | 0.193  | 0.847 |

\* Because the number of mother/infant pairs (N=3,184) used in this joint maternal/fetal genetic association analysis is much smaller than the number of mothers (N=8,643) used in the maternal only analysis, some of the loci were not significant for the maternal association. However, for the significant or marginal significant ones (highlighted in bold), the associations were exclusively observed in mothers supporting the maternal contribution.

**Table S16. Conditional association tests of replicated loci**

| Region                 | Chr | Primary     |           |          | Secondary   |           |          |           |                         |              |
|------------------------|-----|-------------|-----------|----------|-------------|-----------|----------|-----------|-------------------------|--------------|
|                        |     | SNP         | Pos       | <i>P</i> | SNP         | Pos       | <i>P</i> | Dist (kb) | <i>r</i> <sup>2</sup> @ | <i>D'</i>  # |
| <i>Gestational age</i> |     |             |           |          |             |           |          |           |                         |              |
| <i>EBF1</i>            | 5   | rs2963463   | 157895049 | 1.03E-21 | rs13172197  | 157736918 | 2.40E-06 | 158.1     | 0.005                   | 0.144        |
| <i>EEFSEC</i>          | 3   | rs2955117   | 127881613 | 7.24E-12 | rs7431308   | 128049793 | 4.53E-05 | 168.2     | 0.051                   | 0.523        |
| <i>AGTR2</i>           | X   | rs201226733 | 115164770 | 5.71E-11 | rs12556792  | 115129442 | 0.00373  | 35.3      | 0.237                   | 1.000        |
| <i>WNT4</i>            | 1   | rs56318008  | 22470407  | 1.15E-09 | rs140353641 | 22593805  | 0.000191 | 123.4     | 0.053                   | 0.530        |
| <i>ADCY5</i>           | 3   | rs4383453   | 123068359 | 9.62E-08 | rs78661226  | 122918928 | 4.71E-05 | 149.4     | 0.050                   | 0.743        |
| <i>RAP2C</i>           | X   | rs200879388 | 131300571 | 4.52E-07 | rs191919091 | 131530470 | 0.00289  | 229.9     | 0.010                   | 1.000        |
| <i>BOLA3</i>           | 2   | rs4853012   | 74361290  | 1.05E-07 | rs10166357  | 74230656  | 9.21E-05 | 130.6     | 0.040                   | 0.209        |
| <i>Preterm birth</i>   |     |             |           |          |             |           |          |           |                         |              |
| <i>EBF1</i>            | 5   | rs2963463   | 157895049 | 3.15E-13 | rs113113900 | 157685341 | 3.95E-06 | 209.7     | 0.001                   | 0.087        |
| <i>EEFSEC</i>          | 3   | rs201450565 | 128058610 | 1.44E-10 | rs56268882  | 128231953 | 2.37E-05 | 173.3     | 0.019                   | 0.185        |
| <i>AGTR2</i>           | X   | rs201386833 | 115164281 | 8.45E-07 | rs79390335  | 115064123 | 0.00386  | 100.2     | 0.000                   | 0.025        |
| <i>TEKT3</i>           | 17  | rs7217780   | 15191024  | 3.52E-07 | rs11655028  | 15362705  | 0.00101  | 171.7     | 0.017                   | 0.751        |
| <i>TGFB1</i>           | 19  | rs11466328  | 41851042  | 5.31E-07 | rs338599    | 41700493  | 0.00627  | 150.5     | 0.000                   | 0.034        |

\* The secondary SNPs were identified by GCTA-COJO --cojo-cond analysis conditioning on the primary SNP (index SNP with the smallest *P* value).

@ The *r*<sup>2</sup> was estimated based on genotypic allele counts of the reference 1000 Genome Phase 1 EUR samples.

# The Lewontin's |*D'*| was calculated based on haplotype frequencies estimated via the EM algorithm.

**Table S17. Variance explained by all common SNPs (MAF > 0.01) estimated using GCTA**

|      | Gestational age |       |        |          |      | Preterm birth |       |       |          |      |
|------|-----------------|-------|--------|----------|------|---------------|-------|-------|----------|------|
|      | Vg/Vp           | SE    | LRT    | <i>P</i> | n    | Vg/Vp_L       | SE    | LRT   | <i>P</i> | n    |
| FIN  | 0.379           | 0.281 | 2.234  | 0.067    | 888  | 0.681         | 0.324 | 5.135 | 0.012    | 888  |
| MoBa | 0.121           | 0.153 | 0.766  | 0.191    | 1834 | 0.153         | 0.178 | 0.784 | 0.188    | 1834 |
| DNBC | 0.165           | 0.057 | 8.908  | 0.001    | 5921 | 0.211         | 0.087 | 6.291 | 0.006    | 5756 |
|      |                 |       |        |          |      |               |       |       |          |      |
| Meta | 0.167           | 0.052 | 10.163 | 0.001    |      | 0.226         | 0.076 | 8.921 | 0.001    |      |

\* The estimate of variance explained was transformed to the underlying liability scale.

# The meta results were calculated using fixed effect inverse variance approach.

**Table S18. Variance explained in the replication studies using GWA SNPs identified from discovery data set (23andMe)**

| $\alpha$ | Markers* | Variance explained (%) |       |       |       |
|----------|----------|------------------------|-------|-------|-------|
|          |          | FIN                    | MoBa  | DNBC  | Avg   |
| 1.0E-06  | 12       | 0.84%                  | 0.69% | 0.97% | 0.84% |
| 2.0E-06  | 13       | 0.91%                  | 0.78% | 1.04% | 0.91% |
| 5.0E-06  | 18       | 1.02%                  | 0.79% | 0.87% | 0.87% |
| 1.0E-05  | 29       | 0.90%                  | 0.43% | 0.65% | 0.61% |
| 2.0E-05  | 41       | 0.20%                  | 0.60% | 0.59% | 0.52% |
| 5.0E-05  | 114      | 0.15%                  | 0.34% | 0.21% | 0.25% |

\*The number GWA SNPs identified at different levels of significance ( $\alpha$ ) from discovery (23andMe) data set.

**Table S19. Difference in gestational length between individuals with high (top quartile) and low (bottom quartile) genetic scores**

|      | Bottom quartile* |       | Top quartile |       | Difference |              |          |
|------|------------------|-------|--------------|-------|------------|--------------|----------|
|      | mean             | sd    | mean         | sd    | mean       | 95% CI       | P-value  |
| FIN  | 262.12           | 23.44 | 267.41       | 23.17 | 5.29       | (0.94,9.64)  | 0.017    |
| MoBa | 261.19           | 20.28 | 264.64       | 20.32 | 3.45       | (0.82,6.08)  | 0.01012  |
| DNBC | 257.40           | 27.51 | 264.36       | 25.03 | 6.96       | (3.61,10.31) | 0.00005  |
|      |                  |       |              |       |            |              |          |
| Meta | 259.81           | 24.14 | 265.06       | 22.91 | 5.24       | (3.32,7.16)  | 9.39E-08 |

\* The top and bottom genetic quartiles were selected based on a genetic score calculated using the 12 index SNPs with discovery  $P$ -value  $< 1E-6$

## Supplementary References

1. Durand EY, Do CB, Mountain JL, Macpherson JM. Ancestry Composition: A Novel, Efficient Pipeline for Ancestry Deconvolution. *bioRxiv* 2014.
2. Henn BM, Hon L, Macpherson JM, et al. Cryptic distant relatives are common in both isolated and cosmopolitan genetic samples. *PLoS One* 2012;7:e34267.
3. Browning SR, Browning BL. Rapid and accurate haplotype phasing and missing-data inference for whole-genome association studies by use of localized haplotype clustering. *American journal of human genetics* 2007;81:1084-97.
4. Fuchsberger C, Abecasis GR, Hinds DA. minimac2: faster genotype imputation. *Bioinformatics* 2015;31:782-4.
5. Plunkett J, Doniger S, Orabona G, et al. An evolutionary genomic approach to identify genes involved in human birth timing. *PLoS genetics* 2011;7:e1001365.
6. Magnus P, Birke C, Vejrup K, et al. Cohort Profile Update: The Norwegian Mother and Child Cohort Study (MoBa). *International journal of epidemiology* 2016;45:382-8.
7. Myking S, Boyd HA, Myhre R, et al. X-chromosomal maternal and fetal SNPs and the risk of spontaneous preterm delivery in a Danish/Norwegian genome-wide association study. *PLoS One* 2013;8:e61781.
8. Olsen J, Melbye M, Olsen SF, et al. The Danish National Birth Cohort--its background, structure and aim. *Scandinavian journal of public health* 2001;29:300-7.
9. Ryckman KK, Feenstra B, Shaffer JR, et al. Replication of a genome-wide association study of birth weight in preterm neonates. *The Journal of pediatrics* 2012;160:19-24 e4.
10. Nohr EA, Timpson NJ, Andersen CS, Davey Smith G, Olsen J, Sorensen TI. Severe obesity in young women and reproductive health: the Danish National Birth Cohort. *PLoS One* 2009;4:e8444.

11. Paternoster L, Evans DM, Nohr EA, et al. Genome-wide population-based association study of extremely overweight young adults--the GOYA study. *PLoS One* 2011;6:e24303.
12. Zhang G, Bacelis J, Lengyel C, et al. Assessing the Causal Relationship of Maternal Height on Birth Size and Gestational Age at Birth: A Mendelian Randomization Analysis. *PLoS medicine* 2015;12:e1001865.
13. Carvalho B, Bengtsson H, Speed TP, Irizarry RA. Exploration, normalization, and genotype calls of high-density oligonucleotide SNP array data. *Biostatistics* 2007;8:485-99.
14. Scharpf RB, Irizarry RA, Ritchie ME, Carvalho B, Ruczinski I. Using the R Package *crIimm* for Genotyping and Copy Number Estimation. *Journal of statistical software* 2011;40:1-32.
15. Delaneau O, Marchini J, Zagury JF. A linear complexity phasing method for thousands of genomes. *Nature methods* 2012;9:179-81.
16. Genomes Project C, Abecasis GR, Auton A, et al. An integrated map of genetic variation from 1,092 human genomes. *Nature* 2012;491:56-65.
17. Marchini J, Howie B. Genotype imputation for genome-wide association studies. *Nature reviews Genetics* 2010;11:499-511.
18. Hendricks AE, Dupuis J, Logue MW, Myers RH, Lunetta KL. Correction for multiple testing in a gene region. *Eur J Hum Genet* 2014;22:414-8.
19. Gao X, Starmer J, Martin ER. A multiple testing correction method for genetic association studies using correlated single nucleotide polymorphisms. *Genetic epidemiology* 2008;32:361-9.
20. Welter D, MacArthur J, Morales J, et al. The NHGRI GWAS Catalog, a curated resource of SNP-trait associations. *Nucleic Acids Res* 2014;42:D1001-6.

21. Consortium GT. The Genotype-Tissue Expression (GTEx) project. *Nature genetics* 2013;45:580-5.
22. Yang J, Ferreira T, Morris AP, et al. Conditional and joint multiple-SNP analysis of GWAS summary statistics identifies additional variants influencing complex traits. *Nature genetics* 2012;44:369-75, S1-3.
23. Zhang G, Karns R, Sun G, et al. Finding missing heritability in less significant Loci and allelic heterogeneity: genetic variation in human height. *PLoS One* 2012;7:e51211.
24. Yang J, Lee SH, Goddard ME, Visscher PM. GCTA: a tool for genome-wide complex trait analysis. *American journal of human genetics* 2011;88:76-82.
25. de Leeuw CA, Mooij JM, Heskes T, Posthuma D. MAGMA: generalized gene-set analysis of GWAS data. *PLoS Comput Biol* 2015;11:e1004219.
26. Wagner GP, Kin K, Lynch VJ. Measurement of mRNA abundance using RNA-seq data: RPKM measure is inconsistent among samples. *Theory Biosci* 2012;131:281-5.
27. Weirauch MT, Yang A, Albu M, et al. Determination and inference of eukaryotic transcription factor sequence specificity. *Cell* 2014;158:1431-43.
28. Johnson DS, Mortazavi A, Myers RM, Wold B. Genome-wide mapping of in vivo protein-DNA interactions. *Science* 2007;316:1497-502.
29. Lynch VJ, Nnamani MC, Kapusta A, et al. Ancient transposable elements transformed the uterine regulatory landscape and transcriptome during the evolution of mammalian pregnancy. *Cell Rep* 2015;10:551-61.
30. Langmead B, Salzberg SL. Fast gapped-read alignment with Bowtie 2. *Nature methods* 2012;9:357-9.
31. Langmead B, Trapnell C, Pop M, Salzberg SL. Ultrafast and memory-efficient alignment of short DNA sequences to the human genome. *Genome Biol* 2009;10:R25.



32. Brohee S, Bontempi G. D-peaks: a visual tool to display ChIP-seq peaks along the genome. *Transcription* 2012;3:255-9.
33. Buenrostro JD, Giresi PG, Zaba LC, Chang HY, Greenleaf WJ. Transposition of native chromatin for fast and sensitive epigenomic profiling of open chromatin, DNA-binding proteins and nucleosome position. *Nature methods* 2013;10:1213-8.
34. Miller DE, Patel ZH, Lu X, Lynch AT, Weirauch MT, Kottyan LC. Screening for Functional Non-coding Genetic Variants Using Electrophoretic Mobility Shift Assay (EMSA) and DNA-affinity Precipitation Assay (DAPA). *J Vis Exp* 2016.
